# Supplementary material for: New pyrimidine- and fluorene-containing oligo(arylene)s: synthesis, crystal structures, optoelectronic properties and a theoretical study
Source: Royal Society of Chemistry journal article supplement (doi:10.1039/b305870k), 2003-01-01
Supplement: b305870k.doc [file b305870k.doc]

New pyrimidine– and fluorene–containing oligo(arylene)s: synthesis, crystal structures, optoelectronic properties and a theoretical study

___________________________________________________________________

**Gregory Hughes,***a* **Changsheng Wang,***a* **Andrei S. Batsanov,***a* **Michael Fern,***a* **Stephen Frank,***a*  **Martin R. Bryce,****a* **Igor F. Perepichka,***b* **Andrew P. Monkman***c* **and Ben P. Lyons***c*

*a Department of Chemistry, University of Durham, South Road, Durham, UK DH1 3LE.*

# Fax: +44 191 384 4737; E-mail: m.r.bryce@durham.ac.uk

*b* *L. M. Litvinenko Institute of Physical Organic and Coal Chemistry, National Academy of Sciences of Ukraine, Donetsk 83114, Ukraine.*

*c Department of Physics, University of Durham, South Road, Durham, UK DH1 3LE.*

___________________________________________________________________

Supporting Information

**Synthetic Procedures**

# **2-Chloro-5-bromopyrimidine**

2-Hydroxypyrimidine hydrochloride (Lancaster) (12.5g, 93.4 mmol) was dissolved in a Na2CO3 solution (5.0 g, 47.2 mmol) in water (275 cm3). Bromine (5.0 cm3, 97.6 mmol) was added slowly and the reaction mixture was stirred for 30 min at 20oC. The solvent was evaporated to leave a yellow solid. Toluene (225 cm3) was added and the solution refluxed with an azeotropic distillation (24 h) to remove the remaining water. Toluene was removed by distillation and the resultant solid was dried *in vacuo* (24 h). Phosphorus oxychloride (45.0 cm3) and N,N-dimethylaniline (4.5 cm3) were added and the mixture was heated under reflux for 8 h. Excess phosphorus oxychloride was removed under reduced pressure with any residual hydrolysed with external cooling. The product was extracted into diethyl ether (150 cm3), washed with saturated Na2CO3 solution and dried with MgSO4. The solution was concentrated and purified by flash chromatography on silica gel (eluent DCM:hexane, 1:1 v/v) and finally by recrystallising from hexane to yield 8.26 g (45%) of colourless crystals of 2-chloro-5-bromopyrimidine, m.p 78 – 78.6 oC (Lit.[[1]](#footnote-2) 79 oC). m/z (EI) 196 (M+[81Br, 37Cl], 18%), 194 (M+[81Br, 37Cl] or [81Br, 37Cl], 73%), 192 (M+[79Br, 37Cl], 57%). H (CDCl3) 8.68 (s, 2H). C (CDCl3) 118.82, 159.90, 160.049.

**2,5-Dibromopyrimidine (4)**

2-Chloro-5-bromopyrimidine (8.0 g, 41.4 mmol) dissolved in DCM (25 cm3) was added to stirred 48% hydrobromic acid (25 cm3), along with a few drops of Aliquat 336. The two phase system was strirred at 20oC for 72 h. A white solid was visible after 24 h. The solvent was removed *in vacuo* and the residue was neutralised with saturated Na2CO3 (aq), extracted into diethyl ether (150 cm3), and dried with MgSO4. Diethyl ether was removed under reduced pressure yielding a white solid, which was recrystallised from hexane to afford thin white needles of **4**, 6.33 g (64%). m.p 84 oC (Lit.[[2]](#footnote-3) 83 – 84 oC). m/z (EI) 240 (M+[81Br, 81Br], 40% ), 238 (M+, 84%, 81Br, 79Br), 236 (M+, 44%, 79Br, 79Br). H (CDCl3) 8.63 (s, 2H). C (CDCl3) 119.70, 150.84, 159.90.

**2,7-Dibromo-9,9-dihexylfluorene 9.** 2,7-Dibromofluorene **8** (12.96 g, 40 mmol) and 1-bromohexane (28 cm3, 0.2 mol) were added to freshly distilled THF (120 cm3), which was subsequently cooled to 0 oC. Potassium *tert*-butoxide (1.0 M in THF, 40 cm3) was added slowly with stirring (30 min) resulting in a pink suspension. After stirring at 0 °C for 1 h an additional portion of potassium *tert*-butoxide (1.0 M in THF, 45 cm3) was added and the solution was stirred at 20 oC overnight. The inorganic salts were removed by filtration, the filtrate was concentrated and purified by column chromatography on silica (eluent: hexane) to give a light yellow oil, which was crystallised from ethanol to yield compound **9** (16.7 g, 85% yield) as white plates, mp 72 – 73 °C (lit.[[3]](#footnote-4) mp 67.5 – 68.5 °C). Anal. calcd. for C25H32Br2: C, 60.99; H, 6.55. Found: C, 60.89; H, 6.60. *m/z* (EI) (%) 490 (14) 492 (M+, 100) 494 (13). H (CDCl3) 0.59 (m, 4H), 0.79 (m, 6H), 1.10 (m, 12H), 1.93 (m, 4H, *J* = 8.0 Hz), 7.46 (m, 4H), 7.53 (m, 2H). C (CDCl3) 13.98, 22.56, 23.61, 29.56 31.44, 40.17, 55.65, 121.09, 121.43,126.12, 130.10, 139.01, 152.50.

**9,9-Dihexylfluroene-2,7-diboronic acid 10.** To a solution of compound **9** (2.46 g, 5.00 mmol) in dry THF (100 cm3) was added *n-*butyllithium solution in hexane (1.6 M, 6.9 cm3, 11.04 mmol) dropwise at –78 oC. The mixture was stirred at –78 oC under argon for an additional 6 h to give a white suspension. Triisopropylborate (5.0 cm3) was added quickly at –78 oC and the mixture was stirred overnight allowing the temperature to rise gradually to 20 oC. Water (30 cm3) was added to the white suspension and the mixture was stirred at 20 oC for a further 4 h. The organic solvent was removed *in vacuo*; water (100 cm3) was added and then acidified with conc. HCl. The product was extracted into diethyl ether (3 × 50 cm3). The organic layer was separated, dried (MgSO4) and evaporated *in vacuo* giving a white solid, which was recrystallised from acetonitrile to yield white crystals of compound **10** (1.68 g, 80% yield) mp 297 – 298 °C. Anal. calcd. for C25H32B2O4: C, 71.12; H, 8.60. Found, C, 71.39; H, 8.62. H [(CD3)2SO) 0.45 (s, 4H), 0.68 (m, 6H, *J* = 6.6 Hz), 0.98 (m, 12H), 1.93 (m, 4H, *J* = 7.8 Hz), 7.73 (m, 4H, *J* = 1.8 Hz) 7.81 (s, 2H), 8.00 (s, 4H). C [(CD3)2SO) 13.78, 21.95, 23.43, 29.00, 30.93, 54.17, 119.01, 128.37, 132.88, 142.31, 149.36.


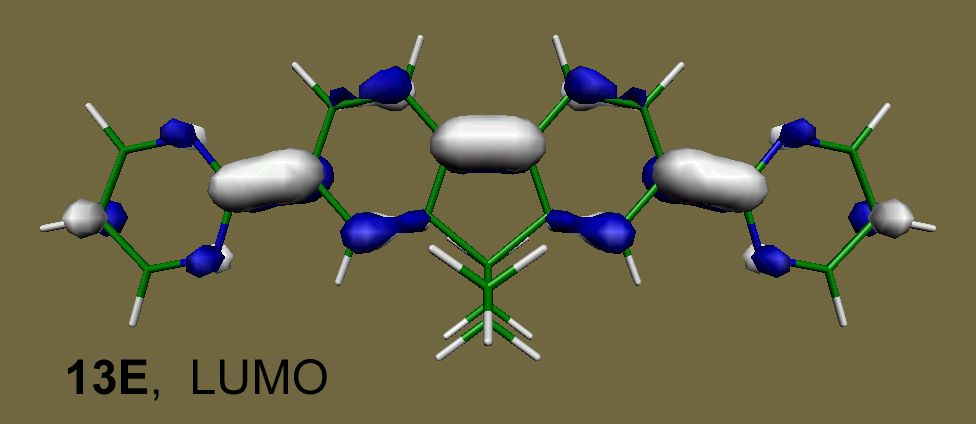

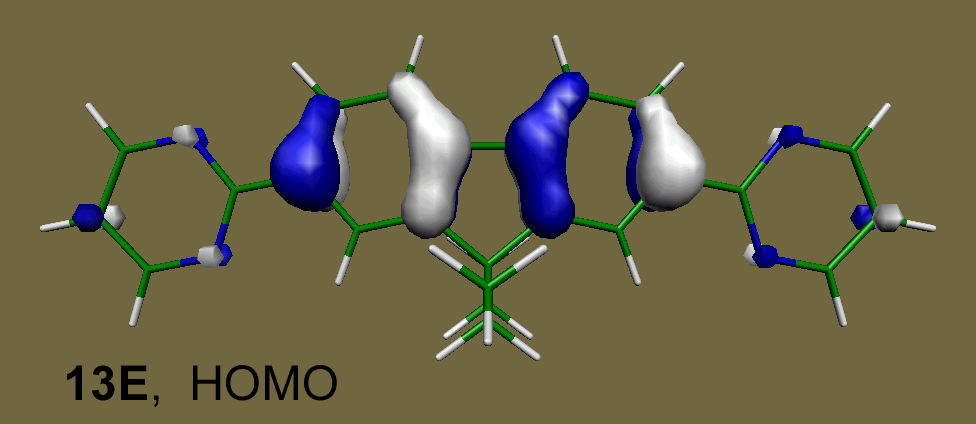


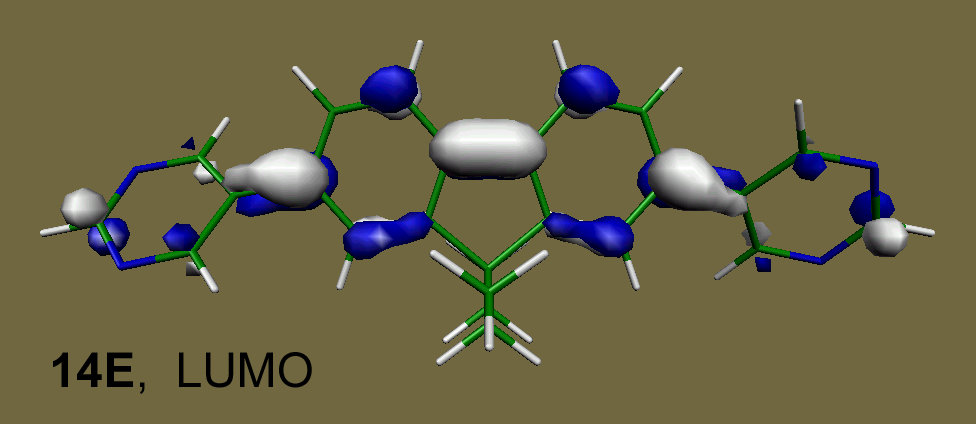

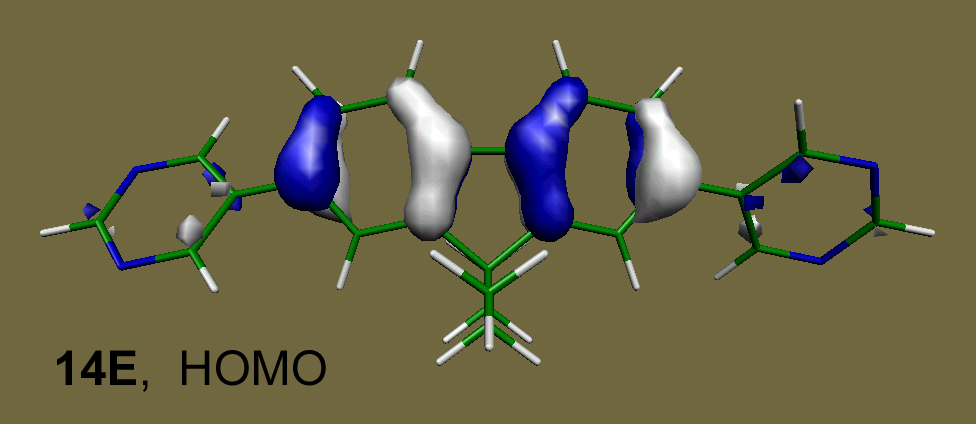


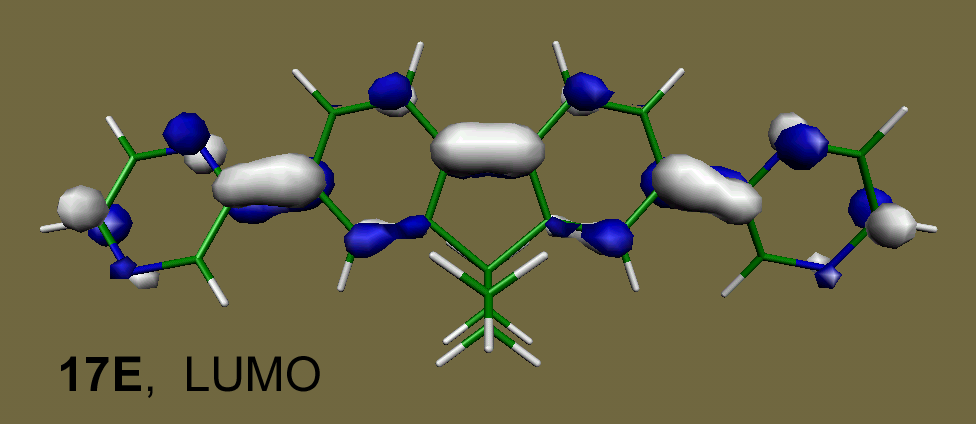

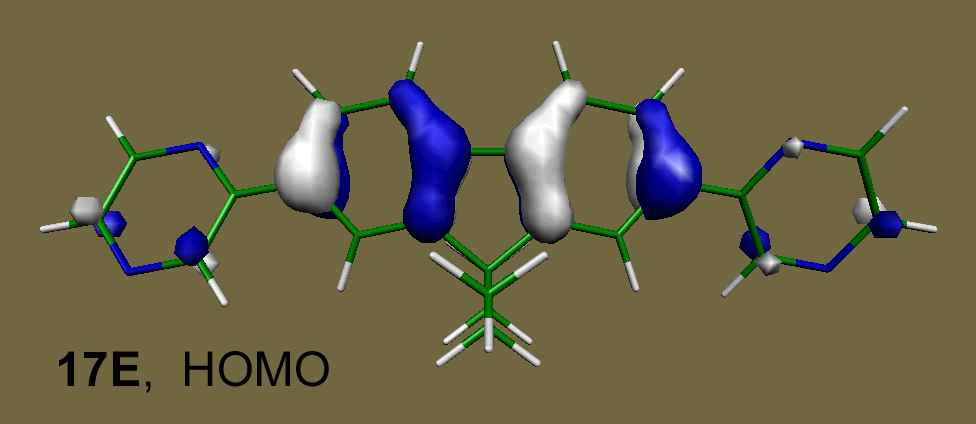


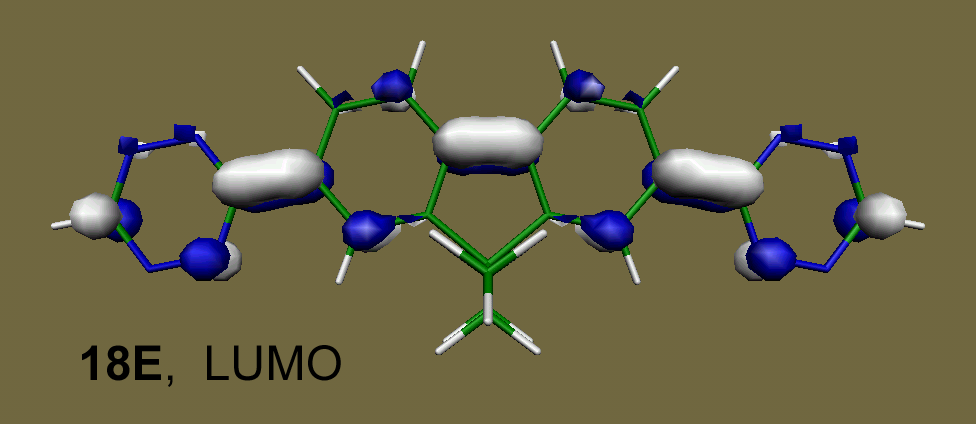

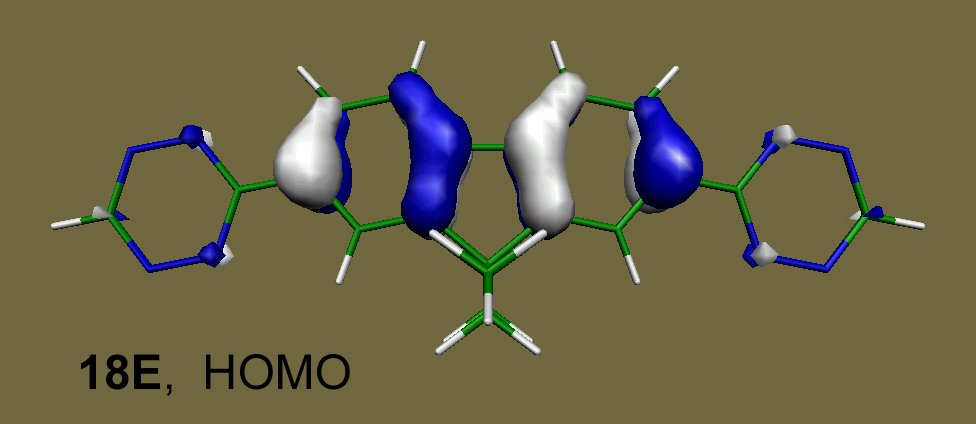


**Figure S-1.** HF/6-31G(d,p)//B3LYP/6-31G(d,p) frontier orbitals of compounds **13E**, **14E, 17E**, and **18E**.


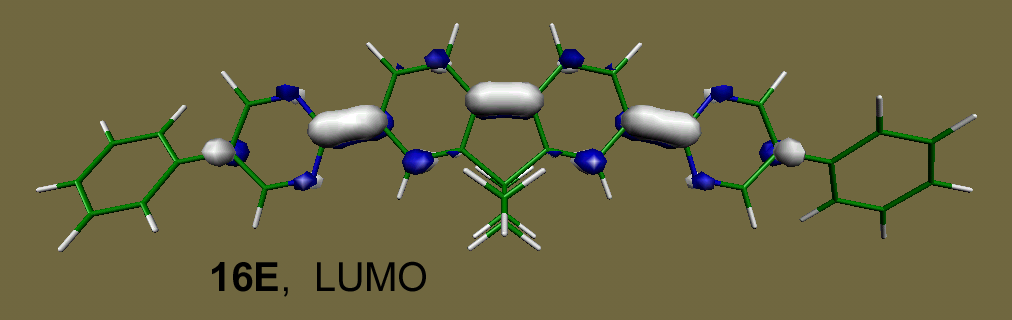

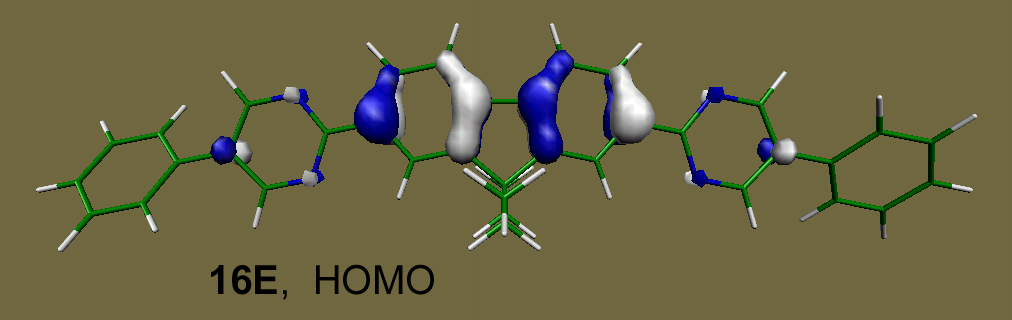


**Figure S-2.** HF/6-31G(d,p)//B3LYP/6-31G(d,p) frontier orbitals of compound **16E**.


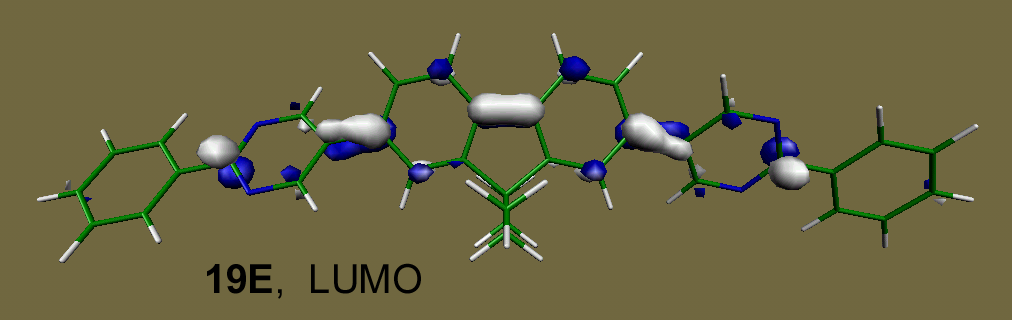

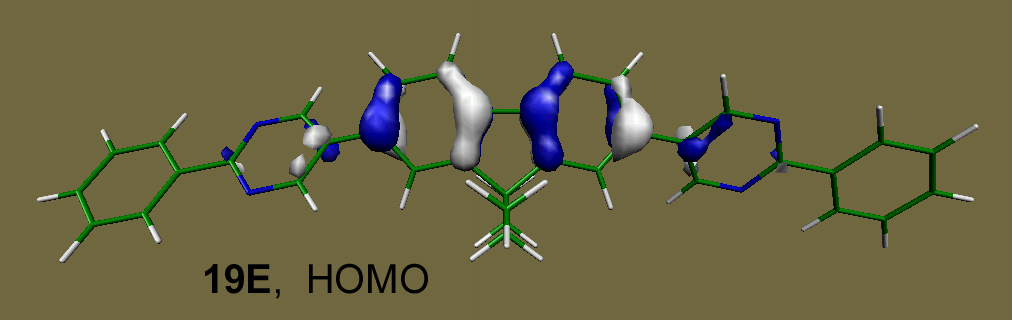


**Figure S-3.** HF/6-31G(d,p)//B3LYP/6-31G(d,p) frontier orbitals of compound **19**.


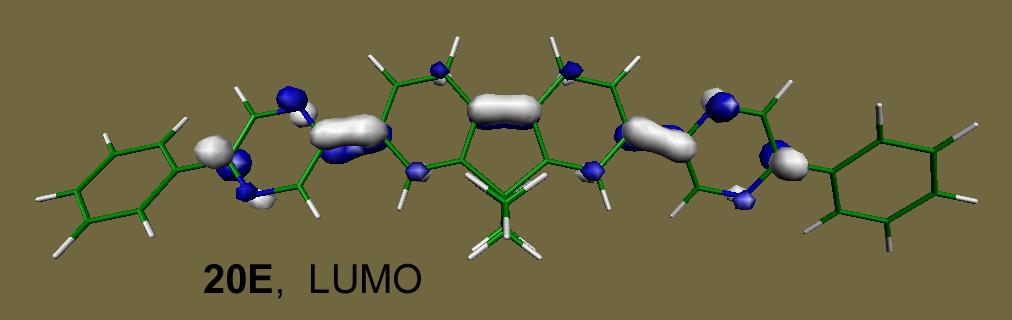

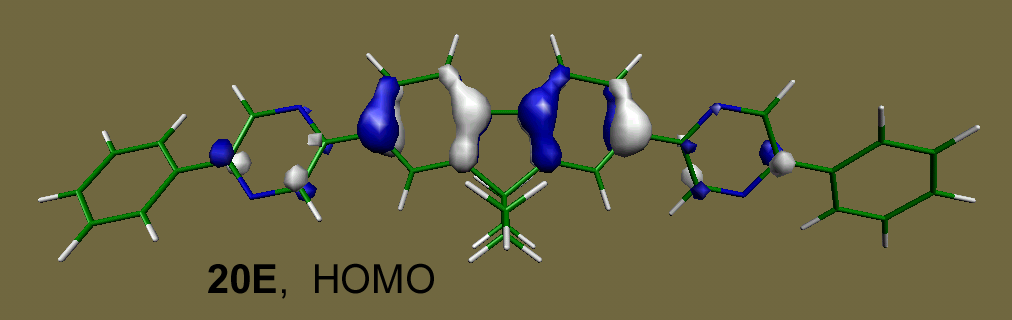


**Figure S-4.** HF/6-31G(d,p)//B3LYP/6-31G(d,p) frontier orbitals of compound **20E**.


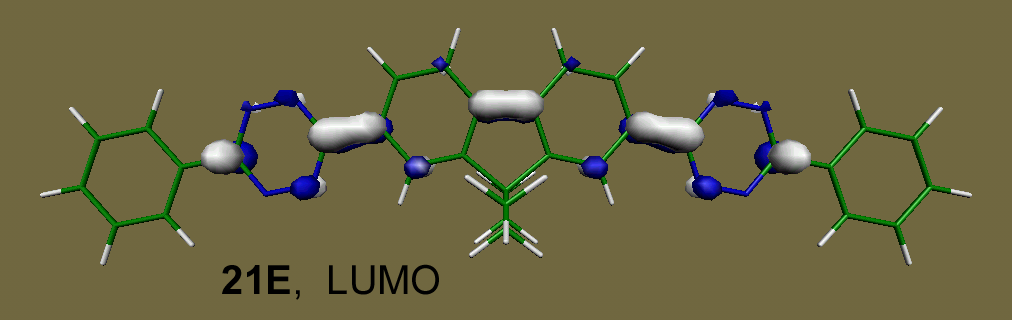

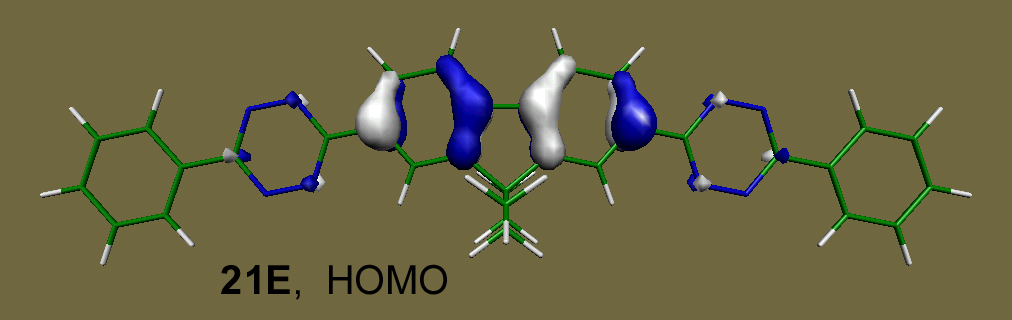


**Figure S-5.** HF/6-31G(d,p)//B3LYP/6-31G(d,p) frontier orbitals of compound **21E**.

**B3LYP/6-31G(d,p) optimised geometries of compounds 13E, 14E, 16E – 21E.**

| **13E**  C 0.73211 1.11640 -0.00001  C -0.73211 1.11641 0.00002  C -1.18006 -0.22153 0.00002  C 0.00000 -1.19331 0.00000  C 1.18006 -0.22153 -0.00002  C 2.53675 -0.50645 -0.00004  C 3.46847 0.54966 -0.00006  C 3.01220 1.88075 -0.00005  C 1.65082 2.16996 -0.00002  C -1.65082 2.16996 0.00003  C -3.01220 1.88075 0.00006  C -3.46847 0.54966 0.00007  C -2.53675 -0.50645 0.00005  C 4.92195 0.25976 -0.00010  C -4.92195 0.25976 0.00010  N -5.29866 -1.03469 0.00002  C -6.60874 -1.28323 -0.00007  C -7.56654 -0.27136 -0.00010  C -7.07330 1.03190 -0.00006  N -5.76899 1.30853 0.00003  N 5.76899 1.30853 -0.00003  C 7.07330 1.03190 0.00004  C 7.56654 -0.27136 0.00008  C 6.60874 -1.28323 0.00006  N 5.29866 -1.03469 -0.00002  H 8.62941 -0.48463 0.00013  H -8.62941 -0.48463 -0.00016  C -0.00002 -2.10682 -1.26020  C 0.00002 -2.10682 1.26021  H 2.90706 -1.52585 -0.00005  H 3.74677 2.67734 -0.00006  H 1.31412 3.20281 -0.00002  H -1.31412 3.20281 0.00003  H -3.74677 2.67734 0.00007  H -2.90706 -1.52585 0.00006  H -6.90158 -2.33224 -0.00010  H -7.74833 1.88657 -0.00008  H 7.74833 1.88657 0.00007  H 6.90158 -2.33224 0.00008  C -0.00001 -1.38715 -2.61160  H 0.87691 -2.76407 -1.19776  H -0.87698 -2.76404 -1.19776  H -0.87692 -2.76407 1.19777  H 0.87698 -2.76404 1.19775  C 0.00002 -1.38715 2.61160  H -0.88466 -0.75433 -2.72906  H 0.88468 -0.75441 -2.72908  H 0.88466 -0.75434 2.72906  H -0.88468 -0.75441 2.72909  H -0.00005 -2.11554 -3.42896  H 0.00006 -2.11555 3.42896 | **14E**  C 0.73275 1.09689 -0.00314  C -0.73276 1.09689 0.00315  C -1.17971 -0.24003 0.00840  C -0.00000 -1.21236 0.00000  C 1.17970 -0.24003 -0.00840  C 2.53766 -0.52467 -0.01013  C 3.47751 0.52570 -0.01040  C 3.01456 1.85514 -0.00776  C 1.65233 2.14750 -0.00243  C -1.65234 2.14750 0.00244  C -3.01457 1.85514 0.00776  C -3.47751 0.52570 0.01040  C -2.53766 -0.52467 0.01014  C 4.92728 0.23579 -0.01358  C -4.92729 0.23578 0.01358  C -5.48443 -0.83099 0.73541  N -6.79077 -1.10872 0.74132  C -7.56613 -0.29412 0.01787  N -7.16752 0.75619 -0.70753  C -5.85530 1.00436 -0.70604  C 5.85530 1.00436 0.70604  N 7.16752 0.75619 0.70752  C 7.56612 -0.29412 -0.01788  N 6.79076 -1.10872 -0.74132  C 5.48442 -0.83099 -0.73541  H 8.63261 -0.50832 -0.01952  H -8.63262 -0.50832 0.01951  C -0.00829 -2.12522 -1.26124  C 0.00830 -2.12522 1.26125  H 2.88527 -1.55395 0.01450  H 3.73342 2.66829 -0.03593  H 1.31949 3.18144 -0.00681  H -1.31949 3.18144 0.00682  H -3.73342 2.66828 0.03593  H -2.88527 -1.55396 -0.01449  C -0.01612 -1.40578 -2.61264  H 0.86761 -2.78417 -1.20353  H -0.88409 -2.78325 -1.19331  H -0.86762 -2.78415 1.20356  H 0.88408 -2.78326 1.19330  C 0.01617 -1.40578 2.61264  H -0.90141 -0.77334 -2.72638  H 0.86715 -0.77224 -2.73612  H 0.90148 -0.77335 2.72636  H -0.86709 -0.77223 2.73615  H -0.02038 -2.13438 -3.42935  H 0.02044 -2.13438 3.42935  H -4.85060 -1.47269 1.34544  H -5.52001 1.84060 -1.31738  H 5.52001 1.84061 1.31737  H 4.85059 -1.47268 -1.34544 |
| --- | --- |

| **17E**  C -0.73220 1.06917 -0.00017  C 0.73219 1.06918 0.00018  C 1.17966 -0.26754 -0.00459  C -0.00000 -1.24025 0.00000  C -1.17967 -0.26754 0.00460  C -2.53728 -0.55230 0.00365  C -3.47557 0.49956 0.00104  C -3.01355 1.82932 -0.01565  C -1.65294 2.12038 -0.01312  C 1.65293 2.12038 0.01313  C 3.01354 1.82932 0.01566  C 3.47557 0.49957 -0.00104  C 2.53728 -0.55229 -0.00365  C -4.93393 0.23745 0.00948  C 4.93393 0.23745 -0.00948  C 5.48387 -0.98686 -0.43997  N 6.79362 -1.23738 -0.42921  C 7.58501 -0.24741 0.00055  C 7.06026 0.98421 0.39345  N 5.74975 1.23040 0.39445  N -5.74976 1.23039 -0.39446  C -7.06026 0.98420 -0.39346  C -7.58502 -0.24742 -0.00056  N -6.79363 -1.23738 0.42921  C -5.48388 -0.98686 0.43997  H -8.65551 -0.43741 -0.02259  H 8.65550 -0.43740 0.02257  C 0.00498 -2.15315 1.26104  C -0.00496 -2.15315 -1.26104  H -2.87366 -1.58456 -0.02089  H -3.74766 2.62653 -0.03118  H -1.31871 3.15397 -0.02099  H 1.31870 3.15397 0.02100  H 3.74765 2.62653 0.03118  H 2.87365 -1.58455 0.02089  C 0.00897 -1.43333 2.61227  H -0.87063 -2.81259 1.20146  H 0.88113 -2.81129 1.19603  H 0.87065 -2.81259 -1.20144  H -0.88111 -2.81129 -1.19604  C -0.00890 -1.43333 -2.61227  H 0.89340 -0.79999 2.72741  H -0.87508 -0.80032 2.73267  H -0.89333 -0.79999 -2.72743  H 0.87514 -0.80032 -2.73263  H 0.01164 -2.16147 3.42957  H -0.01154 -2.16147 -3.42956  H -7.71387 1.79147 -0.71849  H -4.84773 -1.77997 0.82342  H 4.84772 -1.77997 -0.82341  H 7.71387 1.79148 0.71847 | **18E**  C -0.73175 1.08103 0.00001  C 0.73175 1.08104 -0.00000  C 1.17857 -0.25777 -0.00000  C -0.00000 -1.23018 0.00000  C -1.17857 -0.25777 0.00001  C -2.53471 -0.54237 0.00001  C -3.46239 0.51854 0.00003  C -3.00876 1.85169 0.00003  C -1.64756 2.13747 0.00002  C 1.64756 2.13747 -0.00001  C 3.00876 1.85169 -0.00002  C 3.46239 0.51854 -0.00002  C 2.53471 -0.54236 -0.00001  C -4.90783 0.23201 0.00003  C 4.90783 0.23201 -0.00003  N 5.29819 -1.06296 0.00012  N 6.59152 -1.31972 0.00017  C 7.42236 -0.26980 0.00009  N 7.05766 1.01890 -0.00006  N 5.76525 1.27836 -0.00013  N -5.76525 1.27836 0.00013  N -7.05766 1.01891 0.00006  C -7.42237 -0.26980 -0.00010  N -6.59152 -1.31972 -0.00017  N -5.29820 -1.06296 -0.00012  H -8.48632 -0.48179 -0.00015  H 8.48631 -0.48180 0.00015  C 0.00001 -2.14359 1.26130  C -0.00000 -2.14359 -1.26129  H -2.90232 -1.56259 0.00001  H -3.73931 2.65181 0.00004  H -1.30967 3.16950 0.00001  H 1.30967 3.16950 -0.00001  H 3.73931 2.65181 -0.00004  H 2.90232 -1.56259 -0.00001  C 0.00002 -1.42538 2.61341  H -0.87629 -2.80095 1.19742  H 0.87630 -2.80096 1.19740  H 0.87630 -2.80095 -1.19741  H -0.87629 -2.80096 -1.19740  C -0.00001 -1.42538 -2.61340  H 0.88470 -0.79319 2.73411  H -0.88465 -0.79318 2.73413  H -0.88469 -0.79319 -2.73412  H 0.88466 -0.79318 -2.73412  H 0.00002 -2.15560 3.42857  H -0.00001 -2.15560 -3.42856 |
| --- | --- |

| **16E**  C 0.73191 1.34066 -0.00199  C -0.73190 1.34066 0.00198  C -1.18013 0.00245 0.00272  C -0.00000 -0.96926 0.00000  C 1.18013 0.00245 -0.00272  C 2.53652 -0.28248 -0.00532  C 3.46881 0.77370 -0.00815  C 3.01220 2.10507 -0.00832  C 1.65102 2.39418 -0.00493  C -1.65101 2.39418 0.00492  C -3.01219 2.10508 0.00832  C -3.46880 0.77371 0.00815  C -2.53652 -0.28248 0.00532  C 4.92017 0.48415 -0.01018  C -4.92017 0.48416 0.01020  N -5.30214 -0.80815 0.01234  C -6.60873 -1.05657 0.00708  C -7.58818 -0.05168 0.00973  C -7.07226 1.25349 0.01390  N -5.77124 1.52890 0.00898  N 5.77124 1.52890 -0.00898  C 7.07226 1.25348 -0.01390  C 7.58819 -0.05168 -0.00973  C 6.60874 -1.05657 -0.00708  N 5.30215 -0.80815 -0.01233  C 9.03693 -0.34218 -0.00752  C -9.03693 -0.34218 0.00751  C -9.93213 0.46707 -0.71318  C -11.29860 0.19436 -0.71302  C -11.79811 -0.89517 0.00248  C -10.92000 -1.70884 0.72041  C -9.55387 -1.43431 0.72564  C 9.55387 -1.43431 -0.72564  C 10.92000 -1.70884 -0.72042  C 11.79811 -0.89517 -0.00249  C 11.29861 0.19436 0.71302  C 9.93214 0.46707 0.71318  C -0.00284 -1.88304 -1.26021  C 0.00283 -1.88304 1.26022  H 2.90679 -1.30198 -0.00481  H 3.74674 2.90177 -0.01132  H 1.31439 3.42706 -0.00489  H -1.31439 3.42706 0.00488  H -3.74674 2.90178 0.01132  H -2.90679 -1.30198 0.00483  H -6.89970 -2.10591 -0.01844  H -7.74570 2.10915 0.04012  H 7.74570 2.10915 -0.04012  H 6.89971 -2.10591 0.01845  H -9.55100 1.29942 -1.29733  H -11.97298 0.82847 -1.28100  H -12.86279 -1.10840 0.00062  H -11.30018 -2.55417 1.28643  H -8.88372 -2.05608 1.31186  H 8.88373 -2.05608 -1.31186  H 11.30018 -2.55417 -1.28644  H 12.86279 -1.10840 -0.00062  H 11.97299 0.82847 1.28100  H 9.55100 1.29942 1.29733  C -0.00592 -1.16341 -2.61154  H 0.87423 -2.54014 -1.19957  H -0.87962 -2.54014 -1.19567  H -0.87423 -2.54016 1.19956  H 0.87963 -2.54012 1.19570  C 0.00586 -1.16340 2.61154  H -0.89085 -0.53074 -2.72713  H 0.87840 -0.53060 -2.73111  H 0.89078 -0.53071 2.72715  H -0.87847 -0.53061 2.73109  H -0.00775 -1.89170 -3.42893  H 0.00768 -1.89169 3.42894 | **19E**  C -0.73253 1.34816 0.00271  C 0.73255 1.34815 -0.00272  C 1.17996 0.01124 -0.00753  C -0.00000 -0.96103 0.00002  C -1.17996 0.01125 0.00755  C -2.53764 -0.27362 0.00738  C -3.47910 0.77617 0.00779  C -3.01478 2.10581 0.00661  C -1.65280 2.39833 0.00156  C 1.65283 2.39831 -0.00159  C 3.01481 2.10577 -0.00664  C 3.47912 0.77614 -0.00778  C 2.53764 -0.27365 -0.00734  C -4.92686 0.48682 0.00956  C 4.92687 0.48677 -0.00954  C 5.48835 -0.59454 -0.70670  N 6.78970 -0.86918 -0.71124  C 7.59521 -0.04741 -0.01171  N 7.16907 1.02067 0.68920  C 5.86239 1.26812 0.68703  C -5.86237 1.26815 -0.68703  N -7.16905 1.02070 -0.68919  C -7.59520 -0.04734 0.01178  N -6.78969 -0.86911 0.71130  C -5.48833 -0.59448 0.70675  C -9.04860 -0.33763 0.01342  C 9.04863 -0.33766 -0.01342  C 9.93782 0.48103 0.70118  C 11.30300 0.20673 0.69803  C 11.79901 -0.88627 -0.01647  C 10.92004 -1.70500 -0.72945  C 9.55408 -1.43449 -0.72970  C -9.55406 -1.43447 0.72969  C -10.92001 -1.70502 0.72939  C -11.79897 -0.88633 0.01635  C -11.30296 0.20667 -0.69814  C -9.93779 0.48101 -0.70124  C 0.00724 -1.87385 1.26118  C -0.00728 -1.87387 -1.26111  H -2.88429 -1.30317 -0.01934  H -3.73313 2.91934 0.03614  H -1.32026 3.43242 0.00666  H 1.32030 3.43240 -0.00672  H 3.73316 2.91930 -0.03619  H 2.88428 -1.30320 0.01940  H 9.54076 1.32569 1.25219  H 11.98202 0.84644 1.25430  H 12.86431 -1.09877 -0.01772  H 11.30050 -2.55604 -1.28689  H 8.86221 -2.06174 -1.27980  H -8.86219 -2.06169 1.27984  H -11.30046 -2.55607 1.28683  H -12.86426 -1.09887 0.01756  H -11.98198 0.84635 -1.25446  H -9.54073 1.32567 -1.25225  C 0.01395 -1.15412 2.61242  H -0.86874 -2.53271 1.20292  H 0.88314 -2.53190 1.19420  H 0.86877 -2.53265 -1.20294  H -0.88311 -2.53201 -1.19402  C -0.01424 -1.15418 -2.61237  H 0.89920 -0.52168 2.72646  H -0.86941 -0.52048 2.73473  H -0.89956 -0.52182 -2.72631  H 0.86905 -0.52046 -2.73481  H 0.01753 -1.88244 3.42944  H -0.01785 -1.88251 -3.42938  H 4.85537 -1.25267 -1.30057  H 5.53215 2.11861 1.28187  H -5.53212 2.11861 -1.28191  H -4.85536 -1.25260 1.30063 |
| --- | --- |

| **20E**  C -0.73186 1.31756 0.01112  C 0.73188 1.31757 -0.01108  C 1.17963 -0.01924 -0.02186  C 0.00001 -0.99189 0.00004  C -1.17961 -0.01924 0.02191  C -2.53678 -0.30421 0.03978  C -3.47613 0.74744 0.05247  C -3.01356 2.07762 0.03122  C -1.65331 2.36855 0.01309  C 1.65332 2.36856 -0.01308  C 3.01358 2.07763 -0.03122  C 3.47614 0.74745 -0.05245  C 2.53680 -0.30420 -0.03973  C -4.93140 0.48424 0.08041  C 4.93141 0.48424 -0.08040  C 5.48174 -0.74598 -0.48895  N 6.78641 -0.99818 -0.46546  C 7.61063 -0.01636 -0.05255  C 7.06696 1.23988 0.27562  N 5.76074 1.48506 0.27496  N -5.76072 1.48505 -0.27497  C -7.06694 1.23987 -0.27566  C -7.61062 -0.01635 0.05252  N -6.78641 -0.99818 0.46546  C -5.48173 -0.74598 0.48896  C -9.06170 -0.30704 -0.00119  C 9.06172 -0.30704 0.00114  C 9.94709 0.48364 0.75332  C 11.31011 0.19508 0.78038  C 11.81326 -0.88984 0.06095  C 10.94069 -1.68910 -0.68133  C 9.57875 -1.40336 -0.71003  C -9.57875 -1.40334 0.71000  C -10.94069 -1.68908 0.68128  C -11.81325 -0.88983 -0.06103  C -11.31008 0.19508 -0.78047  C -9.94706 0.48363 -0.75339  C 0.02312 -1.90474 1.26081  C -0.02311 -1.90477 -1.26070  H -2.87313 -1.33656 0.01864  H -3.74803 2.87460 0.02917  H -1.31934 3.40222 0.00130  H 1.31935 3.40222 -0.00131  H 3.74804 2.87461 -0.02919  H 2.87315 -1.33655 -0.01857  H 9.57220 1.31435 1.34256  H 11.97818 0.81407 1.37197  H 12.87568 -1.11390 0.08295  H 11.32374 -2.53727 -1.24139  H 8.89363 -2.01960 -1.28097  H -8.89365 -2.01957 1.28096  H -11.32375 -2.53724 1.24134  H -12.87567 -1.11388 -0.08305  H -11.97814 0.81406 -1.37208  H -9.57216 1.31434 -1.34264  C 0.04581 -1.18464 2.61170  H -0.85304 -2.56451 1.21360  H 0.89860 -2.56249 1.18372  H 0.85312 -2.56444 -1.21357  H -0.89851 -2.56262 -1.18352  C -0.04602 -1.18471 -2.61161  H 0.93172 -0.55122 2.71421  H -0.83652 -0.55161 2.74394  H -0.93202 -0.55138 -2.71404  H 0.83622 -0.55159 -2.74396  H 0.05988 -1.91252 3.42915  H -0.06011 -1.91260 -3.42904  H 4.84748 -1.54560 -0.86294  H 7.71075 2.07774 0.53096  H -7.71072 2.07773 -0.53101  H -4.84749 -1.54560 0.86298 | **21E**  C 0.73165 1.33080 -0.00004  C -0.73167 1.33079 -0.00002  C -1.17880 -0.00806 0.00001  C -0.00000 -0.98023 0.00001  C 1.17878 -0.00805 -0.00003  C 2.53454 -0.29356 -0.00004  C 3.46403 0.76602 -0.00007  C 3.01021 2.09922 -0.00009  C 1.64910 2.38597 -0.00007  C -1.64912 2.38597 -0.00002  C -3.01023 2.09921 0.00000  C -3.46405 0.76600 0.00003  C -2.53455 -0.29357 0.00004  C 4.90800 0.47767 -0.00008  C -4.90801 0.47766 0.00006  N -5.30143 -0.81533 0.00003  N -6.58749 -1.07456 0.00005  C -7.45042 -0.03543 0.00009  N -7.05767 1.25719 0.00012  N -5.77178 1.51726 0.00010  N 5.77176 1.51727 -0.00016  N 7.05765 1.25720 -0.00017  C 7.45040 -0.03543 -0.00009  N 6.58747 -1.07455 -0.00001  N 5.30141 -0.81532 -0.00000  C 8.89568 -0.32766 -0.00009  C -8.89570 -0.32766 0.00012  C -9.83119 0.72050 0.00012  C -11.19457 0.43923 0.00014  C -11.63995 -0.88471 0.00017  C -10.71364 -1.93029 0.00018  C -9.34863 -1.65757 0.00015  C 9.34861 -1.65756 -0.00007  C 10.71362 -1.93029 -0.00008  C 11.63994 -0.88472 -0.00011  C 11.19455 0.43923 -0.00013  C 9.83117 0.72050 -0.00013  C -0.00003 -1.89370 -1.26108  C 0.00004 -1.89366 1.26113  H 2.90135 -1.31413 -0.00003  H 3.74132 2.89894 -0.00011  H 1.31217 3.41842 -0.00009  H -1.31220 3.41842 -0.00004  H -3.74134 2.89892 -0.00000  H -2.90135 -1.31414 0.00006  H -9.47609 1.74439 0.00009  H -11.91146 1.25476 0.00014  H -12.70433 -1.10070 0.00019  H -11.05579 -2.96081 0.00020  H -8.62234 -2.46187 0.00016  H 8.62232 -2.46187 -0.00005  H 11.05577 -2.96081 -0.00006  H 12.70432 -1.10070 -0.00012  H 11.91144 1.25476 -0.00016  H 9.47607 1.74440 -0.00014  C 0.00015 -1.17500 -2.61290  H 0.87635 -2.55106 -1.19743  H -0.87660 -2.55083 -1.19755  H -0.87645 -2.55089 1.19759  H 0.87650 -2.55091 1.19752  C 0.00011 -1.17492 2.61293  H -0.88444 -0.54257 -2.73288  H 0.88492 -0.54281 -2.73277  H 0.88481 -0.54260 2.73278  H -0.88456 -0.54259 2.73288  H 0.00010 -1.90468 -3.42868  H 0.00015 -1.90456 3.42873 |
| --- | --- |

**HF/6-31G(d,p) optimised geometries of compounds 13E, 14E, 16E – 21E.**

**13E**

1|1|UNPC-UNK|FOpt|RHF|6-31G(d,p)|C25H22N4|PCUSER|18-Aug-2002|0||# OPT

RHF/6-31G(D,P)||2,7-bis(pyrimidine-2-yl)-9,9-diethylfluorene RHF/6-31g

(d,p)||0,1|C,-0.7352924267,1.1062157229,-0.0000220913|C,0.7352923622,1

.1062157812,0.0000150137|C,1.1758684516,-0.2164731838,0.0000191472|C,-

0.0000000628,-1.1908530546,-0.000003869|C,-1.1758685515,-0.2164732531,

-0.0000289391|C,-2.525329994,-0.498524877,-0.0000564771|C,-3.447938464

6,0.5486319936,-0.0000790329|C,-2.9958751919,1.8675497663,-0.000065488

7|C,-1.6425913395,2.1531197648,-0.0000379868|C,1.6425912422,2.15311985

92,0.0000329006|C,2.9958750925,1.8675498687,0.0000637361|C,3.447938353

6,0.5486320822,0.0000763314|C,2.5253298919,-0.4985248005,0.0000436376|

C,-4.9065918987,0.2586248115,-0.0001240868|C,4.9065917931,0.2586249095

,0.0001271427|N,5.2816423242,-1.0133004867,0.0000304016|C,6.5745782655

,-1.264586975,0.000097353|C,7.5271614942,-0.2642583982,-0.0000823474|C

,7.0311446882,1.0252065875,-0.000267407|N,5.7409913947,1.2892553609,0.

0000292455|N,-5.7409915054,1.2892552563,-0.0000176945|C,-7.0311447949,

1.0252064653,0.0002797099|C,-7.5271615878,-0.2642585249,0.0000966033|C

,-6.5745783501,-1.264587092,-0.0000907487|N,-5.2816424111,-1.013300589

9,-0.0000330985|H,-8.5792385698,-0.4740790838,0.000115656|H,8.57923847

88,-0.474078946,-0.000094506|C,-0.0000321636,-2.1007884779,1.254397213

3|C,0.0000312765,-2.1007952441,-1.2543980399|H,-2.8845637569,-1.509850

7679,-0.0000664248|H,-3.7148170154,2.6633892581,-0.0000852344|H,-1.309

9968904,3.1760937948,-0.000028024|H,1.3099967868,3.1760938901,0.000026

3466|H,3.7148169142,2.6633893618,0.0000904291|H,2.8845636092,-1.509850

7111,0.0000541082|H,6.8604548001,-2.3030985973,-0.0000853805|H,7.69360

07979,1.8745437026,-0.0000262183|H,-7.693600917,1.8745435745,0.0000532

451|H,-6.8604548738,-2.3030987181,0.0000855314|C,-0.0002574773,-1.3877

100327,2.6061193724|H,-0.8691485578,-2.7518663197,1.1965710283|H,0.869

2325378,-2.7516811846,1.1967433135|H,0.8691463197,-2.7518747931,-1.196

5703568|H,-0.8692347358,-2.7516862445,-1.1967451645|C,0.0002591051,-1.

3877249923,-2.6061256277|H,0.8771834587,-0.7626131252,2.7284612308|H,-

0.8780652915,-0.7631216944,2.7284249598|H,-0.8771804217,-0.7626268223,

-2.7284710118|H,0.8780685941,-0.7631390929,-2.72843093|H,-0.0000577173

,-2.1187826601,3.4091829463|H,0.0000595521,-2.1188038449,-3.4091836361

||Version=x86-Win32-G98RevA.9|HF=-1177.4033374|RMSD=4.089e-009|RMSF=3.

282e-005|Dipole=0.0000002,-0.409086,0.0000095|PG=C01 [X(C25H22N4)]||@

**14E**

1|1|UNPC-UNK|FOpt|RHF|6-31G(d,p)|C25H22N4|PCUSER|18-Aug-2002|0||# OPT

RHF/6-31G(D,P)||2,7-bis(pyrimidine-5-yl)-9,9-diethylfluorene RHF/6-31g

(d,p)||0,1|C,0.7357739801,1.1139063281,-0.0022831152|C,-0.7357746291,1

.1139061445,0.0022788327|C,-1.1760067801,-0.208320643,0.0066797337|C,0

.0000004328,-1.182680352,0.0000010668|C,1.1760068449,-0.208319764,-0.0

066802466|C,2.5264067861,-0.4909833501,-0.0071276353|C,3.4556946851,0.

5508199372,-0.008806406|C,2.9994396314,1.8680031669,-0.0074479017|C,1.

645337384,2.1571299824,-0.001240413|C,-1.6453388203,2.1571291483,0.001

2343603|C,-2.9994410624,1.8680009566,0.0074423993|C,-3.4556951263,0.55

08175096,0.0088035842|C,-2.5264062398,-0.4909851814,0.0071279311|C,4.9

12366469,0.2592850186,-0.0127201928|C,-4.9123666581,0.2592805457,0.012

7151017|C,-5.4839213877,-0.6940741329,0.845347351|N,-6.7756241678,-0.9

607299852,0.8516340688|C,-7.5235259205,-0.2647703999,0.019414032|N,-7.

1060282641,0.6648544692,-0.8160211721|C,-5.8115576057,0.9175027121,-0.

8164387883|C,5.8115591107,0.9175105103,0.8164321748|N,7.1060265562,0.6

648526392,0.8160238235|C,7.523523104,-0.2647782524,-0.019407585|N,6.77

56219843,-0.9607359797,-0.8516270769|C,5.4839199872,-0.6940704041,-0.8

453503861|H,8.5776731667,-0.476587345,-0.0217879586|H,-8.5776771626,-0

.4765713551,0.0218033156|C,-0.0060524769,-2.0914293948,-1.2555315022|C

,0.0060541828,-2.0914241258,1.2555377936|H,2.8717603754,-1.5100760655,

0.0139016212|H,3.7106621924,2.6744654108,-0.031463479|H,1.3166303939,3

.1813785242,-0.0044792722|H,-1.3166331452,3.1813777054,0.0044706954|H,

-3.710663831,2.674462487,0.0314560865|H,-2.8717590086,-1.5100782365,-0

.0138992288|C,-0.014281724,-1.3777507406,-2.6070005413|H,0.8633427242,

-2.742438204,-1.2019883301|H,-0.8731413461,-2.7445574542,-1.1931540184

|H,-0.8633426663,-2.7424313228,1.2019987148|H,0.8731413585,-2.74455410

93,1.1931610444|C,0.0142880936,-1.3777405184,2.6070041588|H,-0.8938688

116,-0.7550482035,-2.7255998373|H,0.8606015021,-0.7499009631,-2.733955

7196|H,0.8938772005,-0.7550407907,2.7256000625|H,-0.8605925008,-0.7498

870054,2.7339586757|H,-0.0161871037,-2.1083750903,-3.4099321299|H,0.01

61923563,-2.1083627255,3.4099380834|H,-4.8756516144,-1.2496804871,1.53

8740618|H,-5.4679887268,1.6640555965,-1.5121209624|H,5.4679885876,1.66

40587876,1.5121175351|H,4.8756497349,-1.2496853647,-1.538735859||Versi

on=x86-Win32-G98RevA.9|HF=-1177.387218|RMSD=7.557e-009|RMSF=1.776e-005

|Dipole=0.0000013,0.2637467,-0.0000015|PG=C01 [X(C25H22N4)]||@

**16E**

1|1|UNPC-UNK|FOpt|RHF|6-31G(d,p)|C37H30N4|PCUSER|12-Aug-2002|0||# OPT

RHF/6-31G(D,P)||2,7-bis(5-phenylpyrimidine-2-yl)-9,9-diethylfluorene R

HF/6-31g(d,p)||0,1|C,-0.7352738891,1.3503858728,0.0006357436|C,0.73527

40608,1.3503859366,-0.0006129167|C,1.1760062423,0.0276678033,-0.001101

5708|C,0.0000001886,-0.9466326796,0.0000292794|C,-1.176005954,0.027667

7324,0.0011452784|C,-2.5253970483,-0.2544374394,0.0024353872|C,-3.4482

087189,0.7928070894,0.0029301654|C,-2.9959958592,2.1117574801,0.002268

176|C,-1.6426587788,2.3972332599,0.0012610728|C,1.6426588621,2.3972333

236,-0.0012550519|C,2.9959960956,2.1117577716,-0.0022565537|C,3.448209

1125,0.7928073845,-0.002896967|C,2.5253973251,-0.2544371259,-0.0023878

832|C,-4.9060925818,0.5029411824,0.0041821656|C,4.9060927677,0.5029396

819,-0.0041427427|N,5.2852291146,-0.766782678,-0.015541881|C,6.5763668

999,-1.0177917027,-0.0141771377|C,7.5452464476,-0.0238039156,-0.006412

941|C,7.0319124418,1.2661325997,0.0026201628|N,5.7435766599,1.52989072

15,0.0061930719|N,-5.7435746118,1.5298903515,-0.0061918072|C,-7.031912

2231,1.2661325586,-0.0026365722|C,-7.5452459527,-0.0238019462,0.006401

6631|C,-6.5763656825,-1.0177913651,0.0141994661|N,-5.2852295122,-0.766

7832168,0.0155845276|C,-9.0012471019,-0.314253919,0.0075629999|C,9.001

24782,-0.3142552362,-0.0076062|C,9.8650387747,0.3743985523,0.840356753

6|C,11.2229708279,0.1060676863,0.836485106|C,11.7402665205,-0.86066955

22,-0.0097545713|C,10.890352493,-1.5546427983,-0.854933299|C,9.5333981

716,-1.2813608721,-0.8566795838|C,-9.5334171741,-1.2813493579,0.856638

9697|C,-10.8903695877,-1.5546310492,0.8548655042|C,-11.740265988,-0.86

06672878,0.0096580548|C,-11.2229520908,0.1060576,-0.8365816321|C,-9.86

50180884,0.3743887613,-0.8404261461|C,0.0012165864,-1.8566169413,1.254

4095258|C,-0.0012163335,-1.8566383815,-1.2543347119|H,-2.8847077448,-1

.2657356397,0.0027921036|H,-3.7149924922,2.9075584718,0.0028600375|H,-

1.3100021895,3.4201812793,0.001053764|H,1.3100021257,3.4201812898,-0.0

010634663|H,3.7149924589,2.9075588561,-0.0028605934|H,2.8847082862,-1.

265735291,-0.0027287122|H,6.8604579917,-2.056756739,-0.0060579869|H,7.

6929909931,2.1164930451,-0.0063128411|H,-7.6929892869,2.1164943539,0.0

062612779|H,-6.860458223,-2.0567561218,0.006082817|H,9.4714251181,1.10

93714945,1.5202065929|H,11.874280499,0.645639393,1.5011210889|H,12.794

9788882,-1.0710614748,-0.0105904392|H,11.2837719743,-2.3025884221,-1.5

204294039|H,8.8868821556,-1.8087601373,-1.5357847967|H,-8.8869154996,-

1.8087382883,1.5357655413|H,-11.2838056321,-2.3025671051,1.5203622448|

H,-12.7949781701,-1.0710599027,0.0104746993|H,-11.8742459512,0.6456221

81,-1.5012388713|H,-9.4713902498,1.1093539953,-1.5202758893|C,0.002449

7103,-1.1437749824,2.6063149081|H,-0.8679340861,-2.507714813,1.1972257

666|H,0.8703082673,-2.5076403169,1.1956388244|H,0.8679368176,-2.507732

3093,-1.1971431266|H,-0.8703053627,-2.5076640367,-1.1955506136|C,-0.00

24572754,-1.1438195594,-2.6062528252|H,0.8801278743,-0.5189138771,2.72

80069802|H,-0.8750520695,-0.5189792911,2.7296589741|H,-0.8801394891,-0

.5189656628,-2.7279531406|H,0.8750404485,-0.519020953,-2.7296096562|H,

0.0032805057,-1.8749141872,3.4092930417|H,-0.003285631,-1.8749730267,-

3.4092180528||Version=x86-Win32-G98RevA.9|HF=-1636.5201917|RMSD=3.525e

-009|RMSF=5.880e-006|Dipole=-0.0000014,-0.4683328,-0.0000161|PG=C01 [X(C37H30N4)]||@

**17E**

1|1|UNPC-UNK|FOpt|RHF|6-31G(d,p)|C25H22N4|PCUSER|17-Sep-2002|0||# OPT

RHF/6-31G(D,P)||2,7-bis(pyrazine-2-yl)-9,9-diethylfluorene RHF/6-31g(d

,p)||0,1|C,-0.7354660178,1.0940440713,-0.0004650671|C,0.735456882,1.09

40439705,0.0004534668|C,1.1755948924,-0.2271902977,-0.0040203455|C,-0.

0000041213,-1.202158423,0.0000105271|C,-1.1756039429,-0.2271906315,0.0

040235193|C,-2.5265254162,-0.5087045422,0.0030906364|C,-3.453310007,0.

5345260594,-0.0014791553|C,-2.9980176825,1.8524681777,-0.0176553079|C,

-1.6453452582,2.1389069679,-0.0134835236|C,1.6453363362,2.1389077706,0

.0134583853|C,2.9980084789,1.8524690005,0.0176319388|C,3.4533006244,0.

5345263776,0.0014699231|C,2.5265164985,-0.5087038542,-0.0030873463|C,-

4.9155435546,0.2645979688,0.0056989733|C,4.9155342989,0.2645976645,-0.

0057068726|C,5.4592882948,-0.8777475041,-0.5978406781|N,6.7509714161,-

1.1238072264,-0.5962493636|C,7.5331936601,-0.2332258898,-0.0161169897|

C,7.0096188725,0.9142530671,0.55042278|N,5.7150899499,1.1578616617,0.5

545917499|N,-5.7150971916,1.157854448,-0.5546130913|C,-7.0096263353,0.

9142441674,-0.5504461573|C,-7.5332036202,-0.2332212367,0.0161174541|N,

-6.7509819891,-1.123795667,0.5962622466|C,-5.459298925,-0.8777393153,0

.5978477418|H,-8.590440719,-0.4278536723,0.0076383247|H,8.5904295983,-

0.4278659249,-0.0076237926|C,0.004082495,-2.1111030894,1.2553160036|C,

-0.0040844819,-2.1111248443,-1.2552777829|H,-2.8636003866,-1.529779582

7,-0.0193455318|H,-3.7169580662,2.6492117275,-0.0335702981|H,-1.314555

1337,3.1624483961,-0.0204450655|H,1.3145457754,3.162449134,0.020408052

1|H,3.7169490612,2.649211956,0.033536815|H,2.8635919138,-1.5297792203,

0.0193600456|C,0.0100655475,-1.3974516435,2.6068022841|H,-0.8650890041

,-2.762625673,1.2006560212|H,0.871366163,-2.7644349768,1.1946721182|H,

0.8650570416,-2.762682919,-1.2005721388|H,-0.8713982231,-2.7644192262,

-1.1946561979|C,-0.0099802485,-1.3974954172,-2.6067759671|H,0.88916626

06,-0.7743581709,2.7263909483|H,-0.8652139944,-0.769857923,2.731858180

9|H,-0.8890605716,-0.7743843002,-2.726420834|H,0.8653201781,-0.7699226

535,-2.731796106|H,0.0107885286,-2.1280274845,3.4099883679|H,-0.010676

895,-2.1280840627,-3.409950861|H,-7.6498961042,1.6459831351,-1.0105807

714|H,-4.8326211574,-1.5925832102,1.0977094856|H,4.8326086273,-1.59259

93473,-1.0976891936|H,7.6498881925,1.6459900383,1.0105609986||Version=

x86-Win32-G98RevA.9|HF=-1177.3722752|RMSD=8.883e-009|RMSF=1.362e-005|D

ipole=0.0000044,0.157938,0.0000052|PG=C01 [X(C25H22N4)]||@

**18E**

1|1|UNPC-UNK|FOpt|RHF|6-31G(d,p)|C21H18N8|PCUSER|23-Aug-2002|0||# OPT

RHF/6-31G(D,P)||2,7-bis(1,2,4,5-tetrazine-3-yl)-9,9-diethylfluorene RH

F/6-31g(d,p)||0,1|C,0.3087809353,0.4308912753,-1.2120675026|C,-1.00406

31456,-0.1247580963,-0.8522989808|C,-0.9783967675,-0.4751417958,0.4970

117466|C,0.3787740525,-0.1667747151,1.1246207058|C,1.1195609594,0.4129

869193,-0.0778796341|C,2.4132508863,0.8835488688,-0.143112398|C,2.9015

912212,1.3769779195,-1.3541849615|C,2.0834974883,1.3908619451,-2.48327

28488|C,0.7855491435,0.9187791969,-2.417678351|C,-2.1437315584,-0.3207

705684,-1.6149097028|C,-3.2627825113,-0.8716221689,-1.0181499816|C,-3.

246347741,-1.225181743,0.3305661293|C,-2.0936918147,-1.0242512043,1.09

19178478|C,4.2898448149,1.8859369606,-1.4393331219|C,-4.4525043225,-1.

8143183353,0.9563788749|N,-4.4037853876,-2.1401589067,2.2413877772|N,-

5.4513997961,-2.6520213723,2.7858789128|C,-6.5159103492,-2.8226160931,

2.0292800914|N,-6.5805041434,-2.5040410466,0.752242323|N,-5.5336716573

,-1.9924630815,0.2075394849|N,4.7263994087,2.3479029611,-2.6044195576|

N,5.9322204607,2.7894787813,-2.6770677944|C,6.6661756053,2.7564549279,

-1.5831266459|N,6.2482171244,2.3011855832,-0.4200412671|N,5.0418708681

,1.859212288,-0.3468422798|H,7.6707685372,3.1237847738,-1.6443942021|H

,-7.388438814,-3.2480930924,2.4826621488|C,1.068783194,-1.4422771485,1

.6721239116|C,0.2636629665,0.8555996926,2.2840511243|H,3.0512894111,0.

8773352778,0.7199696941|H,2.4696328447,1.7723385671,-3.4083970893|H,0.

1650314227,0.93518851,-3.2957072717|H,-2.1695433701,-0.0526002469,-2.6

559018829|H,-4.1541641921,-1.0306385469,-1.5931562719|H,-2.0916644169,

-1.2998592154,2.1292599531|C,1.277139383,-2.5806227651,0.673917766|H,2

.0313671398,-1.1509039447,2.0851093148|H,0.4802973867,-1.8075360661,2.

5101570457|H,-0.287212615,0.3829509685,3.0934721683|H,1.2638688711,1.0

395777858,2.6684589364|C,-0.3951088835,2.1922638957,1.9449242901|H,0.3

359666435,-2.9390067332,0.2720159507|H,1.9032027212,-2.2757347184,-0.1

572598757|H,0.1511045185,2.7245487319,1.1741493265|H,-1.4160055934,2.0

612214703,1.6037995461|H,1.7654452024,-3.4164380676,1.1652673019|H,-0.

4208151787,2.8243962946,2.8270818607||Version=x86-Win32-G98RevA.9|HF=-

1241.1954681|RMSD=7.573e-009|RMSF=3.069e-005|Dipole=0.0102182,-0.00449

94,0.0303391|PG=C01 [X(C21H18N8)]||@

**19E**

1|1|UNPC-UNK|FOpt|RHF|6-31G(d,p)|C37H30N4|PCUSER|20-Aug-2002|0||# OPT

RHF/6-31G(D,P)||2,7-bis(2-phenylpyrimidine-5-yl)-9,9-diethylfluorene R

HF/6-31g(d,p)||0,1|C,-0.7357014639,1.3606215127,-0.0005566624|C,0.7357

108694,1.3606064644,-0.0021576415|C,1.1761508666,0.0383773515,-0.00443

66444|C,-0.0000160692,-0.9358796181,0.0009625818|C,-1.176165477,0.0384

078581,0.0043933777|C,-2.5264101112,-0.2445208569,0.0017761391|C,-3.45

68708881,0.7967286483,0.0010762435|C,-2.9998719842,2.1139695202,-0.000

1841653|C,-1.6458296337,2.4033587094,-0.0046360096|C,1.6458581052,2.40

33330845,-0.0001845576|C,2.9998952316,2.1139107059,-0.0040514033|C,3.4

568701396,0.7966617474,-0.0026508507|C,2.526390297,-0.2445701108,-0.00

12476292|C,-4.9122682274,0.5051008533,0.0023254771|C,4.9122623389,0.50

50069001,-0.0033119071|C,5.4893769164,-0.4594254095,-0.8184181837|N,6.

7775235855,-0.7249580166,-0.8213349591|C,7.5502500571,-0.0251974999,-0

.0040487387|N,7.1082197087,0.9187645688,0.8135426126|C,5.8176042503,1.

1716642044,0.8115494097|C,-5.8175969968,1.1701208256,-0.8138871088|N,-

7.1082193327,0.9172524997,-0.8153574684|C,-7.5502729609,-0.0250159946,

0.0041725026|N,-6.7775529297,-0.7231681551,0.8228392562|C,-5.489399154

9,-0.4576767177,0.8193740533|C,-9.0084539483,-0.317908184,0.0051686412

|C,9.0084419362,-0.3180368609,-0.0045376234|C,9.8672649402,0.377292493

5,0.8420709494|C,11.2232914435,0.103644874,0.84059391|C,11.7369904042,

-0.8660080949,-0.005379452|C,10.888256346,-1.5620319484,-0.8509579346|

C,9.5317310997,-1.2908990935,-0.8516045609|C,-9.5317536357,-1.28908981

55,0.8541554125|C,-10.8882701955,-1.5602668467,0.8539849763|C,-11.7369

843557,-0.8659668514,0.0069705075|C,-11.2232742108,0.102004448,-0.8409

197092|C,-9.86725635,0.3756917295,-0.8428782549|C,0.0035140061,-1.8434

091136,1.2573416782|C,-0.0035551114,-1.8459462242,-1.253579801|H,-2.87

10728324,-1.2638209978,-0.0203883946|H,-3.7109320739,2.920598992,0.023

014345|H,-1.3174785111,3.4277575538,-0.001690115|H,1.3175257414,3.4277

299093,-0.0051999697|H,3.7109701146,2.9204786619,-0.0288797931|H,2.871

0343917,-1.2638296569,0.0229757383|H,9.4658697423,1.1272558728,1.49561

07535|H,11.8778544349,0.6467215397,1.499134236|H,12.7919141986,-1.0778

560513,-0.0057137641|H,11.2820210079,-2.3155878105,-1.509872028|H,8.87

1547885,-1.827586039,-1.5049098006|H,-8.8715862199,-1.8244430103,1.508

5699367|H,-11.2820436908,-2.3125125002,1.5143891705|H,-12.7919013679,-

1.0778476146,0.0076769954|H,-11.877821824,0.6437389715,-1.5005798425|H

,-9.4658528136,1.1243574614,-1.4978990734|C,0.0090868078,-1.1282397743

,2.6079991072|H,-0.8658524132,-2.4944004612,1.2027824354|H,0.870712248

3,-2.4966334021,1.1974652164|H,0.8657596996,-2.4968911291,-1.197660134

8|H,-0.8708053475,-2.4989833007,-1.1924282237|C,-0.0089977662,-1.13350

77801,-2.6056802663|H,0.8884547603,-0.5054278225,2.7274843112|H,-0.866

0320094,-0.5002191192,2.7323731642|H,-0.8883142922,-0.510876655,-2.726

4762436|H,0.8661731826,-0.5058014854,-2.731271245|H,0.0094388428,-1.85

79178695,3.4118461555|H,-0.0093533231,-1.8648088858,-3.4080510619|H,4.

8838025908,-1.0282227103,-1.5039484334|H,5.4789827242,1.9301970639,1.4

971381225|H,-5.4789619387,1.9272610069,-1.5010068517|H,-4.8838352192,-

1.0250976053,1.5060531293||Version=x86-Win32-G98RevA.9|HF=-1636.519192

1|RMSD=4.833e-009|RMSF=6.129e-006|Dipole=0.0000077,0.1641801,-0.000171

3|PG=C01 [X(C37H30N4)]||@

**20E**

1|1|UNPC-UNK|FOpt|RHF|6-31G(d,p)|C37H30N4|PCUSER|13-Sep-2002|0||# OPT

RHF/6-31G(D,P)||2,7-bis(5-phenylpyrazine-2-yl)-9,9-diethylfluorene RHF

/6-31g(d,p)||0,1|C,-0.7353697062,1.3335493341,0.0023307494|C,0.7353718

829,1.333548827,-0.0023459052|C,1.175665784,0.0122860795,-0.0084794423

|C,-0.0000006252,-0.9626297335,-0.0000053486|C,-1.1756644146,0.0122885

917,0.0084683301|C,-2.5264444185,-0.2693787782,0.0120625419|C,-3.45391

33142,0.7736296469,0.0115871152|C,-2.9983506392,2.0917463202,-0.005989

6171|C,-1.6457149422,2.3781431801,-0.0073454014|C,1.6457162537,2.37814

24104,0.007328004|C,2.9983526425,2.0917449235,0.0059696369|C,3.4539149

501,0.7736279608,-0.0115920492|C,2.5264447737,-0.2693810472,-0.0120695

833|C,-4.9144491467,0.5023998295,0.0250669537|C,4.9144510339,0.5023966

935,-0.0250659934|C,5.4608113031,-0.6407547639,-0.6057533444|N,6.75105

31704,-0.8869522783,-0.5955293476|C,7.5558231273,-0.0071049231,-0.0205

172018|C,7.0148795452,1.1613689293,0.512481504|N,5.7237346011,1.402255

0483,0.5124806017|N,-5.7237335728,1.4022575097,-0.512482816|C,-7.01487

65295,1.1613698077,-0.5124804881|C,-7.5558182735,-0.0071144791,0.02050

07009|N,-6.7510502118,-0.8869532672,0.5955244278|C,-5.4608085314,-0.64

07481557,0.6057562464|C,-9.0134357034,-0.2964878941,0.0008473195|C,9.0

134398931,-0.2964851912,-0.0008451673|C,9.8387865502,0.2055218276,1.00

1020594|C,11.1964918591,-0.0668844713,0.9996458098|C,11.7480149601,-0.

8466833419,-0.0019667788|C,10.9323736271,-1.3587513821,-0.9992125307|C

,9.5763868331,-1.0895228937,-0.9979548739|C,-9.5763728813,-1.089535321

7,0.9979568953|C,-10.9323579804,-1.3587684167,0.9992265659|C,-11.74801

10681,-0.8466851055,0.001998017|C,-11.1964997934,-0.0668743978,-0.9996

121905|C,-9.838794197,0.205532484,-1.0010007589|C,0.0088029467,-1.8716

149938,1.2551947902|C,-0.0088080743,-1.8716259992,-1.2551964137|H,-2.8

635077866,-1.2904973144,-0.0099672264|H,-3.7173646957,2.8884500931,-0.

0183235376|H,-1.3151301691,3.401760695,-0.0155242593|H,1.3151301737,3.

401759206,0.0155060955|H,3.7173655559,2.8884500196,0.0183056338|H,2.86

35078236,-1.2904987181,0.0099641404|H,9.4242332123,0.7913148246,1.8015

748828|H,11.8187652569,0.3236324352,1.7852766844|H,12.8026179019,-1.05

84480925,-0.0035468816|H,11.3535087806,-1.9677991283,-1.7794718704|H,8

.9438274782,-1.4895809582,-1.7674707584|H,-8.9438021148,-1.4896029442,

1.7674589816|H,-11.3534846236,-1.9678252767,1.7794844308|H,-12.8026144

643,-1.0584487869,0.003590826|H,-11.8187816642,0.323652263,-1.78523209

34|H,-9.4242486341,0.7913321881,-1.801553975|C,0.0197999748,-1.1578443

274,2.606558459|H,-0.8605802571,-2.5231317986,1.2038350963|H,0.8758886

927,-2.5249020573,1.1914434061|H,0.8605799409,-2.5231369164,-1.2038417

775|H,-0.8758873198,-2.524920629,-1.1914350869|C,-0.019829126,-1.15786

92349,-2.6065668729|H,0.8992731892,-0.5346427206,2.7226594651|H,-0.855

0573822,-0.5303022212,2.7347488899|H,-0.8993101477,-0.5346776988,-2.72

26637635|H,0.8550213697,-0.5303213427,-2.7347733132|H,0.023693308,-1.8

883162539,3.4098640812|H,-0.023726823,-1.8883492859,-3.4098651049|H,4.

8386337968,-1.3610066973,-1.1040184683|H,7.6458148554,1.9227490704,0.9

324893366|H,-7.6458132265,1.9227517783,-0.9324819274|H,-4.8386313891,-

1.361004782,1.1040164025||Version=x86-Win32-G98RevA.9|HF=-1636.4950277

|RMSD=6.746e-009|RMSF=8.941e-006|Dipole=-0.0000096,-0.0889837,0.000002

|PG=C01 [X(C37H30N4)]||@

**21E**

1|1|UNPC-UNK|FOpt|RHF|6-31G(d,p)|C33H26N8|PCUSER|28-Aug-2002|0||# OPT

RHF/6-31G(D,P)||2,7-bis(6-phenyltetrazine-3-yl)-9,9-diethylfluorene RH

F/6-31g(d,p)||0,1|C,0.7350998477,1.3369100766,-0.0000305357|C,-0.73510

01523,1.3369100662,-0.0000205357|C,-1.175110143,0.0138800631,0.|C,0.00

00000136,-0.9610299286,0.0000194643|C,1.175109857,0.0138800798,0.|C,2.

523979859,-0.2688799107,0.|C,3.4439498516,0.7811300958,-0.0000605357|C

,2.9945798423,2.1011400927,-0.0001005357|C,1.6411898402,2.3846400831,-

0.0000705357|C,-1.6411901598,2.3846400598,-0.0000205357|C,-2.994580157

7,2.1011400502,0.0000194643|C,-3.4439501484,0.781130047,0.0000294643|C

,-2.523980141,-0.2688799465,0.0000094643|C,4.8962398537,0.4927901061,-

0.0000605357|C,-4.8962301463,0.4927900367,0.0000394643|N,-5.2961701374

,-0.7705999661,-0.0014505357|N,-6.5547401356,-1.021339975,-0.001420535

7|C,-7.4077901428,-0.0076699811,0.0001194643|N,-7.0079701518,1.2561900

218,0.0016094643|N,-5.7501601535,1.5070400307,0.0015794643|N,5.7501598

465,1.5070401122,-0.0016305357|N,7.0079698482,1.2561901211,-0.00166053

57|C,7.4077898572,-0.0076698761,-0.0001205357|N,6.5547398644,-1.021339

8821,0.0014494643|N,5.2961698626,-0.770599891,0.0014794643|C,8.8607498

592,-0.2966198658,-0.0001105357|C,-8.8607501408,-0.2966199914,0.000119

4643|C,-9.7839601481,0.7455100021,0.0001294643|C,-11.1397501462,0.4725

799925,0.0001194643|C,-11.5867601369,-0.8388200107,0.0001294643|C,-10.

6719401295,-1.8793800042,0.0001294643|C,-9.3149401314,-1.6127099946,0.

0001194643|C,9.3149398686,-1.6127098626,-0.0000705357|C,10.6719398705,

-1.8793798529,-0.0000705357|C,11.5867598631,-0.8388198465,-0.000090535

7|C,11.1397498538,0.4725801504,-0.0001205357|C,9.7839598519,0.74551014

08,-0.0001405357|C,0.0000000265,-1.8703999286,-1.2551505357|C,0.000000

0265,-1.8703499286,1.2552294643|H,2.8795698662,-1.2816799082,0.0000594

643|H,3.7100998366,2.9003600977,-0.0001605357|H,1.308779833,3.40735008

07,-0.0000805357|H,-1.308780167,3.4073500622,-0.0000505357|H,-3.710100

1634,2.9003600451,0.0000494643|H,-2.8795701338,-1.281679949,-0.0000105

357|H,-9.4378401553,1.7610800045,0.0001494643|H,-11.845800152,1.283659

9875,0.0000994643|H,-12.6418001354,-1.0486700182,0.0001294643|H,-11.01

39001223,-2.8989100066,0.0001594643|H,-8.6065201257,-2.4185199896,0.00

00894643|H,8.6065198743,-2.4185198676,-0.0000205357|H,11.0138998777,-2

.8989098505,-0.0000705357|H,12.6417998646,-1.048669839,-0.0000905357|H

,11.845809848,1.2836601554,-0.0001205357|H,9.4378398447,1.7610801383,-

0.0002005357|C,-0.0000101347,-1.1577999286,-2.6072005357|H,0.868629875

,-2.5217099224,-1.1965905357|H,-0.868640125,-2.5217099347,-1.196590535

7|H,-0.868630125,-2.5216599347,1.1966894643|H,0.868639875,-2.521659922

4,1.1966794643|C,0.0000098653,-1.1576999286,2.6072394643|H,-0.87757013

91,-0.5331099348,-2.7311505357|H,0.8775398609,-0.5331099224,-2.7311705

357|H,0.8775598609,-0.5329999224,2.7311694643|H,-0.8775501391,-0.53300

99348,2.7311894643|H,-0.0000301295,-1.8894499286,-3.4092205357|H,0.000

0198705,-1.8893199286,3.4092994643||Version=x86-Win32-G98RevA.9|HF=-17

00.3263232|RMSD=7.542e-009|RMSF=5.878e-006|Dipole=0.0000394,-0.2032216

, 0.|PG=C01 [X(C33H26N8)]||@

**B3PW91/6-31G(d,p) optimised geometries of compounds 13E, 14E, 16E – 21E.**

**13E**

1|1|UNPC-UNK|FOpt|RB3PW91|6-31G(d,p)|C25H22N4|PCUSER|21-Aug-2002|0||#

OPT RB3PW91/6-31G(D,P)||2,7-bis(pyrimidine-2-yl)-9,9-diethylfluorene R

B3pw91/6-31g(d,p)||0,1|C,0.7304909603,1.1173843935,-0.0000179412|C,-0.

7304902169,1.1173853334,0.0000202494|C,-1.1756180076,-0.2190587764,0.0

0002909|C,0.0000001751,-1.1862725015,-0.000002787|C,1.1756183015,-0.21

90584189,-0.0000329441|C,2.5299262529,-0.5064183249,-0.0000703371|C,3.

4604512583,0.5469336861,-0.000098566|C,3.008216704,1.876831119,-0.0000

75471|C,1.649525721,2.1685592036,-0.0000387663|C,-1.6495251397,2.16855

89837,0.000046312|C,-3.0082164853,1.8768307597,0.0000810491|C,-3.46045

06549,0.5469338815,0.0000966101|C,-2.529925463,-0.5064185056,0.0000637

544|C,4.910082725,0.2549357908,-0.0001514758|C,-4.9100818875,0.2549359

038,0.0001471036|N,-5.2811216786,-1.0375676974,0.0000333665|C,-6.58793

29054,-1.2886805579,-0.0000860622|C,-7.5473105693,-0.280783993,-0.0001

257375|C,-7.0567821124,1.0215650312,-0.000070345|N,-5.7556768806,1.300

4174275,0.0000490754|N,5.755677899,1.300417197,-0.0000432785|C,7.05678

31557,1.0215646455,0.0000784539|C,7.5473114521,-0.2807844151,0.0001299

265|C,6.5879336875,-1.2886808718,0.0000833339|N,5.2811225693,-1.037567

8307,-0.0000400979|H,8.6099270035,-0.4964152535,0.0002152867|H,-8.6099

262177,-0.4964146045,-0.0002083111|C,-0.0000331912,-2.0932001499,-1.25

70415598|C,0.0000349057,-2.0931982274,1.2570393304|H,2.9006592293,-1.5

267234997,-0.0000863818|H,3.7465179148,2.6712462534,-0.0000956218|H,1.

3149362757,3.2023657832,-0.0000279217|H,-1.3149369856,3.2023660743,0.0

000407979|H,-3.7465173328,2.6712461747,0.0001049729|H,-2.9006596873,-1

.5267233517,0.0000742666|H,-6.8776462056,-2.3389947434,-0.0001323955|H

,-7.7332082446,1.8756712309,-0.000103714|H,7.7332095763,1.875670634,0.

0001211131|H,6.8776468168,-2.3389951002,0.0001269127|C,-0.0000742755,-

1.3669048411,-2.5988083549|H,0.8771329518,-2.7505228871,-1.1957495802|

H,-0.8771911218,-2.7505288548,-1.1956985018|H,-0.8771267876,-2.7505261

561,1.1957441399|H,0.8771970633,-2.7505215079,1.1956985903|C,0.0000664

595,-1.3669010637,2.5988041959|H,-0.8847156817,-0.7330146856,-2.710565

4517|H,0.8845614604,-0.7330163695,-2.710621744|H,0.8847032619,-0.73300

47721,2.7105647314|H,-0.8845740939,-0.7330187731,2.7106134498|H,-0.000

101978,-2.0881967132,-3.4222332775|H,0.0000943196,-2.0881910604,3.4222

308121||Version=x86-Win32-G98RevA.9|HF=-1184.5410164|RMSD=8.972e-009|R

MSF=5.419e-005|Dipole=-0.0000004,-0.419097,0.0000034|PG=C01 [X(C25H22N4)]||@

**14E**

1|1|UNPC-UNK|FOpt|RB3PW91|6-31G(d,p)|C25H22N4|PCUSER|18-Aug-2002|0||#

OPT RB3PW91/6-31G(D,P)||2,7-bis(pyrimidine-5-yl)-9,9-diethylfluorene R

B3PW91/6-31g(d,p)||0,1|C,0.7311870984,1.1222571026,-0.0032587306|C,-0.

7311821022,1.1222546345,0.0032595788|C,-1.1754181157,-0.2130747983,0.0

086702536|C,0.0000058374,-1.1810292725,0.0000017876|C,1.1754264813,-0.

2130712626,-0.0086683378|C,2.5312075901,-0.5002171393,-0.0106759833|C,

3.4697593721,0.5476038153,-0.0106329177|C,3.0105489246,1.8760156514,-0

.0079049796|C,1.6509746519,2.1706058774,-0.0026878822|C,-1.6509719807,

2.1706015226,0.0026871587|C,-3.0105452809,1.8760081622,0.007903448|C,-

3.4697526691,0.5475951353,0.0106321744|C,-2.5311988987,-0.5002238604,0

.0106773183|C,4.9153669511,0.2566506247,-0.0136876153|C,-4.9153602808,

0.2566416431,0.0136848168|C,-5.4722843047,-0.7993966311,0.7471927372|N

,-6.7754256892,-1.0784331403,0.7529475929|C,-7.5471889394,-0.275668456

3,0.0175197421|N,-7.1500278765,0.7636000684,-0.7194912331|C,-5.8409281

58,1.0129809589,-0.7177437668|C,5.8409369975,1.0129912146,0.7177379792

|N,7.1500356168,0.7636075273,0.719486755|C,7.5471943695,-0.2756654472,

-0.017520547|N,6.7754299034,-1.078429059,-0.7529469148|C,5.4722887356,

-0.7993898106,-0.7471931822|H,8.6139121764,-0.491432571,-0.0190090919|

H,-8.6139070096,-0.4914347931,0.0190079909|C,-0.0086307917,-2.08719915

87,-1.2580087565|C,0.008642703,-2.0871971498,1.2580134917|H,2.87797765

9,-1.5305143276,0.0148239943|H,3.7320933699,2.6876068754,-0.0369187578

|H,1.3201858732,3.2054797704,-0.0073373337|H,-1.3201854277,3.205476044

3,0.0073358458|H,-3.7320917651,2.6875975903,0.0369157825|H,-2.87796688

59,-1.530521823,-0.0148216406|C,-0.0181700655,-1.3613095679,-2.5997931

23|H,0.8678153755,-2.7461397988,-1.202187322|H,-0.8839028671,-2.746526

6064,-1.1906108591|H,-0.8677729201,-2.7461759241,1.2021642249|H,0.8839

457008,-2.7464868442,1.1906454871|C,0.018102507,-1.3613054923,2.599797

379|H,-0.9042579756,-0.7287590733,-2.7075972736|H,0.8641500726,-0.7253

623263,-2.718544387|H,0.9041597124,-0.7287175859,2.7076329957|H,-0.864

2489253,-0.7253952098,2.7185157648|H,-0.0221478334,-2.0828736204,-3.42

25810852|H,0.0220806314,-2.0828684792,3.4225862909|H,-4.8387285702,-1.

4312867629,1.3689281753|H,-5.5042778231,1.8412184104,-1.3404455542|H,5

.5042875297,1.8412303038,1.3404381748|H,4.8387324285,-1.4312807957,-1.

3689270823||Version=x86-Win32-G98RevA.9|HF=-1184.5258302|RMSD=7.593e-0

09|RMSF=1.153e-005|Dipole=-0.0000023,0.22994,0.0000002|PG=C01 [X(C25H2 2N4)]||@

**16E**

1|1|UNPC-UNK|FOpt|RB3PW91|6-31G(d,p)|C37H30N4|PCUSER|15-Aug-2002|0||#

OPT B3PW91/6-31G(D,P)||2,7-bis(5-phenylpyrimidine-2-yl)-9,9-diethylflu

orene RB3PW91/6-31g(d,p)||0,1|C,0.7303838452,1.3683366201,-0.002148926

4|C,-0.7304055948,1.3683370165,0.0021311876|C,-1.175748533,0.031669214

2,0.0027767219|C,-0.0000115474,-0.9356381833,-0.0000094232|C,1.1757260

58,0.0316685564,-0.0027955606|C,2.5299399412,-0.255704045,-0.005311299

2|C,3.4607013418,0.7978414588,-0.0086029625|C,3.0081935307,2.128100007

9,-0.0092977048|C,1.6496913655,2.4196464333,-0.0055894523|C,-1.6497125

584,2.4196473333,0.0055722986|C,-3.0082148946,2.1281016974,0.009279834

|C,-3.4607234486,0.7978433469,0.0085832388|C,-2.5299625751,-0.25570260

44,0.0052916755|C,4.9084039153,0.5064794036,-0.0104897879|C,-4.9084261

066,0.5064820063,0.0104680497|N,-5.2847274866,-0.7840834794,0.01013193

15|C,-6.5880872075,-1.0348060595,0.0047985811|C,-7.5680389263,-0.03329

37249,0.0100463428|C,-7.0555743167,1.2710051287,0.0169673914|N,-5.7577

29544,1.5484215692,0.0120311734|N,5.7577075472,1.5484191159,-0.0120416

631|C,7.0555521356,1.2710025158,-0.0169652591|C,7.5680165638,-0.033296

5953,-0.0100394069|C,6.588064951,-1.0348086866,-0.0047982363|N,5.28470

51018,-0.78408585,-0.0101441471|C,9.0123805969,-0.3257868963,-0.007689

15|C,-9.0124029914,-0.3257842065,0.0077088017|C,-9.905044051,0.4726044

648,-0.7236445728|C,-11.2691171108,0.1977578932,-0.7236490746|C,-11.76

74023349,-0.8828798423,0.0023558719|C,-10.891041291,-1.6855664407,0.73

09611771|C,-9.5273290167,-1.408867406,0.7363273092|C,9.527312871,-1.40

88710123,-0.7363018257|C,10.8910251219,-1.685569846,-0.7309238309|C,11

.7673798828,-0.8828821107,-0.0023122806|C,11.2690883496,0.1977565572,0

.7236869908|C,9.9050153005,0.4726029541,0.7236706362|C,-0.0028454724,-

1.8427169754,-1.2570008756|C,0.0028256981,-1.8427164937,1.2569824414|H

,2.9007049259,-1.2760423831,-0.0043785175|H,3.7465982532,2.922474683,-

0.0128548402|H,1.3150364447,3.4534336418,-0.0057740445|H,-1.3150570046

,3.4534343545,0.0057576641|H,-3.7466191529,2.9224768182,0.0128370775|H

,-2.9007280387,-1.2760407509,0.0043576452|H,-6.8776692046,-2.085178141

5,-0.0239912717|H,-7.7316173198,2.1254089136,0.0465864433|H,7.73159570

49,2.1254060457,-0.0465788424|H,6.877646298,-2.0851808156,0.0239958603

|H,-9.52266652,1.2984403612,-1.317287106|H,-11.9435496797,0.8238483412

,-1.3009871262|H,-12.8319942398,-1.0981780348,0.0003598524|H,-11.27141

75017,-2.524975391,1.3061917952|H,-8.8564733196,-2.0216527157,1.332242

8124|H,8.8564623215,-2.0216572659,-1.3322221167|H,11.2714061394,-2.524

9795853,-1.3061501131|H,12.8319717825,-1.0981800785,-0.0003070449|H,11

.9435159712,0.8238478827,1.3010298259|H,9.5226327344,1.2984396568,1.31

73088101|C,-0.0055785804,-1.1166639911,-2.5986626965|H,0.8741832003,-2

.5005172428,-1.1972970402|H,-0.879866939,-2.5001734007,-1.1936389877|H

,-0.8743405529,-2.5003450333,1.1974078318|H,0.8797091126,-2.5003446821

,1.19349239|C,0.0059010289,-1.1166630405,2.5986432824|H,-0.8903358569,

-0.482591277,-2.7090270156|H,0.8788286903,-0.4827551139,-2.7127494915|

H,0.890789198,-0.4827483683,2.7088668761|H,-0.8783747281,-0.4825960323

,2.7128698085|H,-0.0074359055,-1.8378808624,-3.4221656225|H,0.00776021

86,-1.8378797016,3.4221463878||Version=x86-Win32-G98RevA.9|HF=-1646.49

30296|RMSD=3.327e-009|RMSF=3.362e-006|Dipole=0.0000126,-0.4938639,0.00

00087|PG=C01 [X(C37H30N4)]||@

**17E**

1|1|UNPC-UNK|FOpt|RB3PW91|6-31G(d,p)|C25H22N4|PCUSER|22-Sep-2002|0||#

OPT RB3PW91/6-31G(D,P)||2,7-bis(pyrazine-2-yl)-9,9-diethylfluorene RB3

PW91/6-31g(d,p)||0,1|C,-0.7306226239,1.0963681435,-0.0001010641|C,0.73

06317937,1.0963702987,0.0001257736|C,1.175346014,-0.2387074435,-0.0051

599342|C,0.0000064871,-1.2070473313,0.0000047462|C,-1.1753338607,-0.23

87107216,0.0051646464|C,-2.530767043,-0.5259785489,0.0047029498|C,-3.4

675026814,0.5233555999,0.0015256102|C,-3.0092861332,1.8519284456,-0.01

66240597|C,-1.6514262065,2.1454182524,-0.0140688098|C,1.6514330446,2.1

454223187,0.0140935346|C,3.0092939096,1.8519312138,0.0166394242|C,3.46

75137339,0.5233593623,-0.0015258813|C,2.5307798834,-0.525976045,-0.004

6997014|C,-4.9221573122,0.2615339652,0.0104073558|C,4.9221690541,0.261

5392676,-0.0104155688|C,5.4704210269,-0.9551827836,-0.4569277337|N,6.7

769382282,-1.2073627997,-0.4452443455|C,7.5658005167,-0.2263771939,0.0

0073969|C,7.0420908468,0.9995593372,0.4066668218|N,5.7345796315,1.2470

082591,0.407179019|N,-5.7345638023,1.2470069389,-0.4071873243|C,-7.042

0776451,0.9995562521,-0.4066872241|C,-7.5657897455,-0.226381824,-0.000

766458|N,-6.7769342254,-1.2073685103,0.4452224651|C,-5.4704147767,-0.9

551910381,0.4569117382|H,-8.636176561,-0.4188486201,-0.0248082733|H,8.

6361870138,-0.4188469759,0.0247754173|C,0.0057383843,-2.1131723857,1.2

578343644|C,-0.0057066963,-2.1131786523,-1.2578221406|H,-2.8660281773,

-1.5593743969,-0.0209683495|H,-3.7471005179,2.6468914856,-0.0336456657

|H,-1.3191543485,3.1798879674,-0.022910468|H,1.3191580782,3.1798911221

,0.0229515212|H,3.7471068432,2.6468954834,0.0336640689|H,2.8660423286,

-1.5593717592,0.0209550066|C,0.0105885185,-1.3868501615,2.5993551874|H

,-0.8699323055,-2.7731972678,1.199946391|H,0.8818722849,-2.7719124481,

1.1935103201|H,0.8700407221,-2.7731035804,-1.1999875565|H,-0.881763163

2,-2.7720191451,-1.1934357823|C,-0.0107126996,-1.3868626029,-2.5993458

4|H,0.8951377484,-0.752438902,2.7085749333|H,-0.8731530145,-0.75231747

92,2.7148345088|H,-0.8953430483,-0.7525542821,-2.7085163607|H,0.872947

1878,-0.7522322215,-2.7148760109|H,0.0135865698,-2.1078321676,3.422829

8824|H,-0.0136773946,-2.1078473479,-3.4228134498|H,-7.6955700309,1.802

6015067,-0.7433989283|H,-4.833860717,-1.7411116337,0.8562844118|H,4.83

38617539,-1.7411010216,-0.8562963211|H,7.6955851882,1.8026001202,0.743

3774418||Version=x86-Win32-G98RevA.9|HF=-1184.5186751|RMSD=5.048e-009|

RMSF=6.463e-006|Dipole=0.0000001,0.1397964,0.0000004|PG=C01 [X(C25H22N4)]||@

**18E**

1|1|UNPC-UNK|FOpt|RB3PW91|6-31G(d,p)|C21H18N8|PCUSER|28-Aug-2002|0||#

OPT RB3PW91/6-31G(D,P)||2,7-bis(1,2,4,5-tetrazine-3-yl)-9,9-diethylflu

orene RB3PW91/6-31g(d,p)||0,1|C,-0.7302357536,1.1096370369,-0.00000564

54|C,0.7302333183,1.1096363921,0.0000140144|C,1.1741531965,-0.22770185

43,0.000020267|C,-0.0000022992,-1.1956925084,0.0000036839|C,-1.1741565

232,-0.2277007304,-0.0000127527|C,-2.5280931642,-0.5148195018,-0.00003

19629|C,-3.4542923132,0.5434727852,-0.0000454744|C,-3.0049290296,1.875

5210856,-0.0000343305|C,-1.6463632358,2.1637701902,-0.000016515|C,1.64

63615723,2.1637687543,0.0000261676|C,3.0049269894,1.8755186029,0.00004

46423|C,3.4542893544,0.5434702609,0.0000556012|C,2.5280897107,-0.51482

17372,0.0000394518|C,-4.895795611,0.2549288024,-0.0000725426|C,4.89579

2906,0.254927459,0.0000853099|N,5.281168347,-1.0381255293,0.0000682121

|N,6.5686478615,-1.2970351814,0.0000178241|C,7.4001638994,-0.250900007

3,-0.0000377334|N,7.0393540437,1.0361441012,-0.0000454105|N,5.75258312

03,1.2974762346,-0.0000003401|N,-5.7525886968,1.2974743679,0.000000098

1|N,-7.0393595572,1.036137892,0.0000227524|C,-7.4001652146,-0.25090653

46,0.0000019547|N,-6.5686452886,-1.2970396754,-0.0000418147|N,-5.28116

76302,-1.038126112,-0.0000695688|H,-8.4639874516,-0.4654706061,-0.0000

007|H,8.4639870785,-0.4654596667,-0.0000569409|C,-0.000020631,-2.10248

03728,1.2581507687|C,0.0000152685,-2.1024828639,-1.2581406998|H,-2.895

849181,-1.5359987351,-0.0000402145|H,-3.7390383774,2.6736064345,-0.000

0429941|H,-1.3106273331,3.1967877667,-0.0000116544|H,1.31062698,3.1967

866364,0.000022697|H,3.7390367147,2.6736036503,0.0000551316|H,2.895845

4333,-1.5360011123,0.0000473974|C,-0.0000262198,-1.3780051549,2.600796

3318|H,-0.8763659152,-2.7604023145,1.1953916213|H,0.8763155395,-2.7604

158642,1.1954069051|H,0.876347751,-2.7604206068,-1.1953689745|H,-0.876

33358,-2.7604025225,-1.195407377|C,0.0000525667,-1.3780098093,-2.60078

76341|H,0.8846149289,-0.7446578873,2.7164302976|H,-0.8846602928,-0.744

6455107,2.7164165707|H,-0.8845762114,-0.7446478654,-2.7164356575|H,0.8

846990121,-0.7446651036,-2.7163955305|H,-0.0000373936,-2.1013576679,3.

4219277152|H,0.0000641772,-2.1013634745,-3.421917975||Version=x86-Win3

2-G98RevA.9|HF=-1248.5060522|RMSD=5.814e-009|RMSF=2.149e-005|Dipole=0.

0000022,-0.0307677,-0.0000001|PG=C01 [X(C21H18N8)]||@

**19E**

1|1|UNPC-UNK|FOpt|RB3PW91|6-31G(d,p)|C37H30N4|PCUSER|25-Aug-2002|0||#

OPT RB3PW91/6-31G(D,P)||2,7-bis(2-phenylpyrimidine-5-yl)-9,9-diethylfl

uorene RB3pw91/6-31g(d,p)||0,1|C,-0.7309802923,1.3700578857,0.00322291

7|C,0.7309242468,1.3700618529,-0.003213622|C,1.1756291132,0.0348025777

,-0.0081692056|C,-0.0000187176,-0.9331184127,0.0000320667|C,-1.1756781

673,0.0347957369,0.0082072733|C,-2.5311957302,-0.2525674712,0.00858605

92|C,-3.4713086284,0.7946725464,0.0094019132|C,-3.0106855195,2.1232805

192,0.0086953218|C,-1.6514007686,2.4180047243,0.0031676027|C,1.6513400

085,2.4180129457,-0.0031839313|C,3.0106261677,2.1232938133,-0.00871075

84|C,3.4712530289,0.7946869036,-0.0093917584|C,2.5311457333,-0.2525556

567,-0.0085477871|C,-4.9149892743,0.504510787,0.0110219883|C,4.9149310

233,0.5045210467,-0.0110181918|C,5.4760244292,-0.5681896538,-0.7174718

852|N,6.7743947697,-0.8437771845,-0.7215611407|C,7.5754112385,-0.03107

62409,-0.0125184255|N,7.1518670478,1.027866675,0.6976087627|C,5.848127

4214,1.2761382994,0.6952032265|C,-5.8481768189,1.276123639,-0.69521760

69|N,-7.1519189551,1.0278626461,-0.6976289458|C,-7.5754754185,-0.03106

57178,0.0125124772|N,-6.7744695472,-0.8437620758,0.7215723029|C,-5.476

0965795,-0.5681844765,0.7174888074|C,-9.0252541503,-0.322368105,0.0135

230027|C,9.0251902661,-0.3223792966,-0.0135469227|C,9.9112378932,0.488

5382179,0.7088968234|C,11.2742363915,0.2132676952,0.7063530618|C,11.76

94107381,-0.87297917,-0.0153008417|C,10.892613945,-1.6839553934,-0.736

0675744|C,9.5288978569,-1.4121308832,-0.7369769979|C,-9.5289721875,-1.

4121115683,0.7369578066|C,-10.8926877351,-1.6839379033,0.7360287692|C,

-11.7694735005,-0.8729713739,0.0152376494|C,-11.2742885377,0.213267781

4,-0.7064206277|C,-9.9112904579,0.4885400317,-0.7089448654|C,0.0079219

209,-1.8391987352,1.2579808778|C,-0.0079351283,-1.8392336073,-1.257891

2964|H,-2.8769411048,-1.2831232945,-0.0194505627|H,-3.731678679,2.9352

406506,0.0400274606|H,-1.3208347608,3.4529900214,0.0089339041|H,1.3207

689122,3.4529965615,-0.0089727713|H,3.731616415,2.9352556562,-0.040064

7665|H,2.8768939945,-1.2831097594,0.0195079653|H,9.5113901053,1.329069

7087,1.26590448|H,11.9532355388,0.8475510086,1.2694299759|H,12.8347884

943,-1.0867518907,-0.0160413705|H,11.2737309886,-2.5309477201,-1.29978

73193|H,8.83515552,-2.03305551,-1.2936028159|H,-8.8352382842,-2.033029

073,1.2936020393|H,-11.273812856,-2.5309243324,1.2997518432|H,-12.8348

509443,-1.0867457506,0.0159624802|H,-11.9532788382,0.847543421,-1.2695

167642|H,-9.5114342726,1.329064934,-1.2659564109|C,0.017317516,-1.1130

569582,2.5995550191|H,-0.8688221741,-2.4977951317,1.2020290762|H,0.883

0485077,-2.4988279446,1.191037495|H,0.8684785734,-2.4982406949,-1.2016

014564|H,-0.8833961522,-2.4984492336,-1.1912450052|C,-0.0164889424,-1.

1131283978,-2.5994908722|H,0.9036022754,-0.4807507283,2.7071798198|H,-

0.8648074931,-0.476709452,2.7176396019|H,-0.9024415634,-0.4804177567,-

2.707468977|H,0.8659732133,-0.4771899793,-2.7172618903|H,0.0208533894,

-1.8342701802,3.4227242632|H,-0.020045893,-1.8343645616,-3.4226398729|

H,4.8432161227,-1.2185611009,-1.3212519112|H,5.5166074985,2.1202961513

,1.2995792646|H,-5.5166463695,2.1202694683,-1.2996047546|H,-4.84329767

14,-1.2185518062,1.3212831715||Version=x86-Win32-G98RevA.9|HF=-1646.49

19858|RMSD=7.118e-009|RMSF=1.086e-006|Dipole=0.0000325,0.1074437,0.000

0017|PG=C01 [X(C37H30N4)]||@

**20E**

1|1|UNPC-UNK|FOpt|RB3PW91|6-31G(d,p)|C37H30N4|PCUSER|27-Sep-2002|0||#

OPT RB3PW91/6-31G(D,P)||2,7-bis(5-phenylpyrazine-2-yl)-9,9-diethylfluo

rene RB3PW91/6-31g(d,p)||0,1|C,0.7303003658,1.3441062899,-0.0126457274

|C,-0.7302727125,1.3441120533,0.0126781748|C,-1.175233602,0.0089042125

,0.0244581218|C,0.0000035166,-0.9593705009,-0.0000061453|C,1.175251553

6,0.0088946324,-0.0244494982|C,2.5301925444,-0.278616674,-0.0448548282

|C,3.4680441427,0.7704662913,-0.0592523687|C,3.0093356514,2.0995072061

,-0.0366736584|C,1.6518791376,2.3929040644,-0.015927838|C,-1.651840179

1,2.3929197137,0.0159793129|C,-3.0092990017,2.0995349986,0.0367191951|

C,-3.4680198177,0.7704982207,0.0592759089|C,-2.5301790927,-0.278594093

,0.0448586591|C,4.9195507877,0.5074078532,-0.0897088447|C,-4.919529977

7,0.5074551194,0.0897259589|C,-5.4672605633,-0.7177672476,0.5095306112

|N,-6.7685614155,-0.9724711827,0.4834548563|C,-7.5898931966,0.00207000

34,0.0584446732|C,-7.0496415345,1.2564936801,-0.2736005606|N,-5.746557

2504,1.5034033654,-0.2719287106|N,5.7465924235,1.5033414264,0.27195373

15|C,7.0496723914,1.2564147378,0.2736201248|C,7.5899074352,0.001988536

4,-0.0584426631|N,6.7685625349,-0.97253946,-0.4834573857|C,5.467263471

,-0.7178174192,-0.5095259648|C,9.0361853958,-0.2924002896,0.0015742683

|C,-9.0361730262,-0.2922993019,-0.0015871619|C,-9.9162337838,0.4825896

879,-0.7717260591|C,-11.2762521746,0.1897133613,-0.8033865025|C,-11.78

00475203,-0.8837289891,-0.0709615121|C,-10.9116781769,-1.6677295788,0.

6887122038|C,-9.5528230967,-1.3774009021,0.7221207523|C,9.5528142344,-

1.3775009418,-0.7221492092|C,10.9116666681,-1.6678475136,-0.688752188|

C,11.7800515585,-0.8838663586,0.0709223666|C,11.2762763991,0.189575973

1,0.803362922|C,9.9162615123,0.482468793,0.7717148887|C,-0.0260170828,

-1.8654984935,-1.2575214687|C,0.0260390856,-1.865531995,1.2574845665|H

,2.8653301884,-1.3121380255,-0.0226018473|H,3.7475977484,2.8941951591,

-0.0352892989|H,1.3199740933,3.427483942,-0.0030031717|H,-1.3199254556

,3.4274963342,0.0030727658|H,-3.747554721,2.894229126,0.0353479302|H,-

2.8653258709,-1.312111906,0.0225861142|H,-9.5386158343,1.3041838143,-1

.3730578735|H,-11.9424767192,0.7966313946,-1.4099372546|H,-12.84192732

22,-1.1114808983,-0.0967363145|H,-11.2962685532,-2.5084573893,1.259415

9638|H,-8.8674137519,-1.9817901611,1.3068609399|H,8.8673947665,-1.9818

765748,-1.3068907231|H,11.2962417687,-2.5085747517,-1.2594670942|H,12.

8419285929,-1.1116330285,0.0966857961|H,11.9425142998,0.7964783152,1.4

099145793|H,9.5386564753,1.3040612026,1.3730573379|C,-0.0524180129,-1.

1389136796,-2.5986385051|H,0.8504744271,-2.5255910437,-1.2137229832|H,

-0.9011078677,-2.5241734541,-1.1793376781|H,-0.8503193638,-2.525793227

3,1.2135642339|H,0.9012665656,-2.524034561,1.1793813308|C,0.0521592252

,-1.1389827225,2.5986265768|H,-0.938753678,-0.5046670255,-2.6934321909

|H,0.8292289551,-0.5041022466,-2.7278124038|H,0.9383689981,-0.50457709

31,2.6935374133|H,-0.8296177343,-0.5043370039,2.7277216775|H,-0.068417

1222,-1.8596034926,-3.4222490809|H,0.0681992709,-1.8596940251,3.422217

8604|H,-4.8322536724,-1.5114377155,0.8967985321|H,-7.6953241417,2.0928

960305,-0.5319672959|H,7.6953696019,2.0928055053,0.5319900975|H,4.8322

468617,-1.5114786127,-0.8967962928||Version=x86-Win32-G98RevA.9|HF=-16

46.477177|RMSD=7.275e-009|RMSF=8.038e-007|Dipole=-0.0000175,-0.1570645

,-0.0000071|PG=C01 [X(C37H30N4)]||@

**21E**

1|1|UNPC-UNK|FOpt|RB3PW91|6-31G(d,p)|C33H26N8|PCUSER|31-Aug-2002|0||#

OPT RB3PW91/6-31G(D,P)||2,7-bis(6-phenyltetrazine-3-yl)-9,9-diethylflu

orene RB3pw91/6-31g(d,p)||0,1|C,0.7302189199,1.3642101702,-0.000034752

8|C,-0.7302183744,1.3642074293,-0.0000151457|C,-1.1742668348,0.0267960

666,0.0000142407|C,0.0000050632,-0.9410028375,0.000016347|C,1.17427093

42,0.02680112,-0.0000175157|C,2.527660921,-0.2615840236,-0.0000298159|

C,3.4560792685,0.7950555707,-0.0000605861|C,3.0068039699,2.1273201592,

-0.0000787536|C,1.6483387391,2.4168387003,-0.0000654803|C,-1.648341243

7,2.4168327225,-0.0000221992|C,-3.0068057682,2.1273101791,-0.000000592

5|C,-3.4560782134,0.7950449632,0.0000272472|C,-2.5276560065,-0.2615926

114,0.0000353413|C,4.8957676128,0.5033803094,-0.0000719183|C,-4.895766

8351,0.50336925,0.0000469335|N,-5.2822483661,-0.7885026139,0.000065333

3|N,-6.5622004945,-1.0518190928,0.0000898261|C,-7.4264141416,-0.017669

3544,0.0001002877|N,-7.0407066901,1.2738437054,0.0000823933|N,-5.76061

62821,1.5380160185,0.0000578886|N,5.760617146,1.5380248017,-0.00011613

58|N,7.0407080401,1.2738489872,-0.0001272786|C,7.4264131245,-0.0176629

505,-0.0000960546|N,6.562196968,-1.0518126053,-0.0000527815|N,5.282246

6482,-0.7884933905,-0.0000416926|C,8.8668560098,-0.3155614145,-0.00010

21203|C,-8.8668571467,-0.3155647458,0.0001174731|C,-9.8049623959,0.727

0106495,0.0001100582|C,-11.1650639952,0.439348096,0.0001263074|C,-11.6

028229483,-0.8851471605,0.000150307|C,-10.6729375412,-1.9250003427,0.0

001578733|C,-9.3112492691,-1.6457907935,0.0001410097|C,9.3112464447,-1

.6457878125,-0.0000782923|C,10.6729346998,-1.9249988952,-0.0000845506|

C,11.6028217166,-0.8851470603,-0.0001134817|C,11.1650642525,0.43934869

88,-0.0001365532|C,9.8049628319,0.7270127006,-0.000131198|C,-0.0000200

419,-1.847800001,-1.2579302548|C,0.0000203214,-1.8477528203,1.25799662

85|H,2.8942060274,-1.2832164067,-0.0000155889|H,3.7416127839,2.9248626

367,-0.0001024723|H,1.313852461,3.4503579404,-0.000078419|H,-1.3138592

585,3.4503532983,-0.000045121|H,-3.7416163085,2.9248510512,-0.00000548

71|H,-2.8942000124,-1.2832256343,0.0000565376|H,-9.4528907036,1.752870

6072,0.0000919703|H,-11.8864499674,1.2513261343,0.0001201736|H,-12.666

454855,-1.1064738288,0.0001631355|H,-11.010325771,-2.957423839,0.00017

68761|H,-8.5790305721,-2.4458453763,0.000146015|H,8.5790270539,-2.4458

41789,-0.0000551837|H,11.0103215952,-2.9574228634,-0.0000667372|H,12.6

664535882,-1.1064751789,-0.0001178772|H,11.8864510869,1.2513260663,-0.

0001588047|H,9.4528920652,1.7528729802,-0.0001497019|C,-0.0000414739,-

1.1228950359,-2.6003544618|H,0.8764542554,-2.5056818924,-1.195515176|H

,-0.876508638,-2.5056595425,-1.1954849527|H,-0.8764696552,-2.505615834

2,1.1956057614|H,0.8764932582,-2.5056358536,1.1955765272|C,0.000045763

3,-1.1227971961,2.6003935451|H,-0.8846813087,-0.4894119823,-2.71514508

75|H,0.8846092761,-0.4894361628,-2.7151866377|H,0.8846994564,-0.489331

9761,2.7151695381|H,-0.8845911204,-0.4893117154,2.7151922518|H,-0.0000

714683,-1.845735388,-3.4220383664|H,0.0000477659,-1.845606501,3.422104

7231||Version=x86-Win32-G98RevA.9|HF=-1710.4735351|RMSD=4.919e-009|RMS

F=2.116e-005|Dipole=-0.0000015,-0.2657302,0.0000064|PG=C01 [X(C33H26N8)]||@

1. [?] D. J. Brown and J. M. Lyall, *Aust. J. Chem*., 1964, **17**, 794. [↑](#footnote-ref-2)
2. [?] B. W. Arantz and D. J. Brown, *J. Chem. Soc., C*, 1971, 1889. [↑](#footnote-ref-3)
3. [?] S. Destri, M. Pasini, C. Botta, W. Porzio, F. Bertini and L. Marchio, *J. Mater. Chem*., 2002, **12**, 924. [↑](#footnote-ref-4)
